**Frontline Healthcare workers suffering from psychosomatic disorders during COVID-19 (a pandemic) – A Systematic review**

Rhythm Joshi<sup>a</sup>, Nidhi.B.Agarwal<sup>a</sup>, Dinesh Bhurani<sup>b</sup>, Mohd Ashif Khan<sup>a\*</sup>

<sup>a</sup>Centre for Translational & Clinical Research, School of Chemical and Life Sciences, Jamia Hamdard, New Delhi 110062, India

<sup>b</sup>Department of Hemato-Oncology & Bone Marrow Transplantation  
Rajiv Gandhi Cancer Institute & Research Centre, Rohini, New Delhi 110085, India

---

**\*Corresponding author**

Dr. Mohd Ashif Khan  
Centre for Translational & Clinical Research  
School of Chemical and Life Sciences  
Jamia Hamdard  
Hamdard Nagar, New Delhi 110062, India  
**Email:** [mhdashifkhan@gmail.com](mailto:mhdashifkhan@gmail.com), [makhan@jamiahamdard.ac.in](mailto:makhan@jamiahamdard.ac.in),  
Mobile no: +91-989102639

## **Abstract**

**Purpose:** The emergence of SARS CoV-2, has imposed high pressure on the healthcare system worldwide. As a consequence, frontline healthcare workers were impacted widely. The aim of this systematic review is to examine the impact of COVID-19 on mental status of FHW during pandemic.

**Methods:** Databases such as PubMed, Scopus, google scholar were searched extensively from the date of inception till April 2021. All cross-sectional studies published in English assessing the mental condition and well-being of frontline caregivers during COVID-19 were included in the study. The quality assessment was done by Newcastle Ottawa scale.

**Results:** Ten thousand eight hundred sixty-nine articles were found. After conscientious literature search, total 78 articles were included satisfying the objective of the review. The highest and lowest values for the rates of depression, anxiety and insomnia was found to be 99.51% & 6.07%, 85.7% & 73.6%, and 5.3% & 11.4%, respectively.

**Conclusion:** It has been found that FHW were psychologically impacted by the pandemic. This could be due to lack of resources such as PPE, organizational support, inefficient relevant knowledge regarding the novel virus, its extremely indelible transmission rates, fear of contamination, stigmatization, and/or due to prevalence of ignorance by government and health policy makers.

**Prospero registration no-** CRD42021244612

**Key words;** Mental disorders, Frontline healthcare workers, Psychosomatic disorders, psychological morbidities, COVID-19.

## **List of abbreviation**

COVID-19- Coronavirus disease 2019

HCWs- Healthcare workers

FL- Frontline

GAD-7- Generalized anxiety disorder assessment scale

PHQ-9- patient health questionnaire

HADS- Hospital anxiety depression scale

ISI- 7- Insomnia severity index

PLC-5- post traumatic stress disorder checklist

IES-R- Impact event scale revised

PHQ-5- Patient health questionnaire

Y-BOCS- Yale brown obsessive compulsive scale

ESS- Epworth sleepiness scale

HADS- Hospital anxiety depression scale

BDI- IA- Beck Depression Inventory

PSQI- Pittsburgh sleep quality index

HARS- Hamilton Anxiety rating scale

NASA- TLX- NASA task load index

STAI-Y1- State- Trait Anxiety Inventory (STAI)

BDI-II- Beck depression inventory- II

DASS-21- Depression, anxiety and stress scale-21 items

PSS-14- The Perceived stress scale 14- item

PSS-10- The perceived stress scale 10- items

BAI- Beck anxiety inventory

PDEQ- Peritraumatic dissociative Experience questionnaire

PSI WHOQL-BREF- World Health organization quality of life instrument

GHQ-12- General Health questionnaire 12- item scale

PHQ-2- Patient health questionnaire 2- item scale

GSI- Global severity index scale 53 item

GAD-2- Generalized anxiety disorder 2- item scale

Pro QoL- Professional Quality of life scale

SAS- Self- rating anxiety scale

EQ-5D-3L- Health status assessment questionnaire of the patient.

ED- Emergency department

ALP- Assistant Laboratory personnel

AN- Assistant nurse

N- Nurse

MD- Medical doctor

Psy- Clinical Psychologist

MLT- Medical laboratory technician

HT- Health Technician

## 1. INTRODUCTION

Coronavirus belong to the family Coronaviridae and order Nidovirales. These are non-segmented, enveloped and single stranded RNA viruses classified under genus coronavirus (P. Chen et al., 2020). Coronavirus disease (COVID-19), whose first case reported in Hubei Province of Wuhan, China in November 2019, has created havoc in lives of people all around the world.

COVID-19 pandemic has led to the worst crisis globally affecting more than 5,378 million people and mortality rate of 1.3 million people as of 14 Nov 2020 (C et al., 2020).

Healthcare workers (HCWs) are at risk of developing mental distress and other psychological symptoms due to high work demand (Fauzi et al., 2020). Moreover, recently various studies have reported the prevalence of depression, anxiety, and insomnia among HCW due to current pandemic (de Burgos-Berdud et al., 2021; Santabárbara et al., 2021).

High transmission and mortality rate of COVID-19 among HCW may be one of the reasons for the prevalence of psychiatric morbidity among them. According to reports, by the end of Feb, 2020 more than 3000 HCW in China got transmitted with the virus (Gan et al., 2020) with the prevalence rate of depression, anxiety, and stress-related symptoms to be 50%, 44.7%, and 73.4%, respectively (Elbay et al., 2020a). Also, Italy faced the death of almost 100 physicians and 26 nurses and over 12,680 HCW were infected from COVID-19 till 7th April 2020 (Barranco and Ventura, 2020). France reported high infection rates among HCWs and more than 50 deaths (McKay et al., 2020; Shaukat et al., 2020) Challenges were knocked together for HCWs due to rapid spread of the disease and delayed onset of symptoms in infected patients or asymptomatic carriers (Hall, 2020; McKay et al., 2020; Shaukat et al., 2020).

Conditions similar to that of battle field are being seen by HCWs in these unprecedented challenges. High levels of anxiety and uncertainties are being experienced and thus persistent

risks of development of stress exposure syndrome and professional burnout are prevailing among those working in frontline]. (Albott et al., 2020; Antonijevic et al., 2020a; Kannampallil et al., 2020; Keubo et al., 2020).

In this phase of COVID-19 attack, HCW being the frontline warriors are the ones who are least talked about.

In this century world has not faced a pandemic as big as COVID-19, which is also new for HCWs, thus, it is need of today to explore the psychological crisis they are being facing (Thamer H. Alenazi et al., 2020). Hence, this systematic review aims to report the mental health condition of HCW during COVID-19.

## **2. METHOD**

### **2.1 Data research strategy**

This study was conducted following PRISMA (Preferred Reporting Items for Systematic Reviews and Meta-analysis) guidelines using suitable keywords such as [Mental disorders OR Depression OR Anxiety OR Bipolar disorder OR Cognitive impairment OR Neurodegenerative disorders] AND [Healthcare workers OR Medical professional OR Doctors OR Nurses] AND [COVID-19] in PubMed, Embase/Elsevier, Cochrane, Science direct and Google scholar from inception till April 2021. Additionally, citations of the included studies were screened manually for the identification of relevant studies. Language of the articles was restricted to English.

### **2.2 Selection criteria for included studies**

Articles fulfilling the following criteria were included: 1. Studies which examined the impact of SARS-CoV-2 on mental health of healthcare professionals; 2. Studies which investigated mental health of FHW; 3. Use of at least one validated quantitative scoring scale to measure mental health outcomes; 4. Available in English Language; 5. Hospital based studies; 6. Conducted from 31st December 2019 (when China reported the first case of SARS-CoV-2 in

Wuhan) till April 2021; 7. Original research (i.e., commentaries, editorials and reviews were excluded), be published in peer reviewed journals. Inclusion of studies in the present systematic review is depicted using PRISMA flowchart (**Figure 1**).

**Figure 1**

*PRISMA Flow diagram showing study selection process*

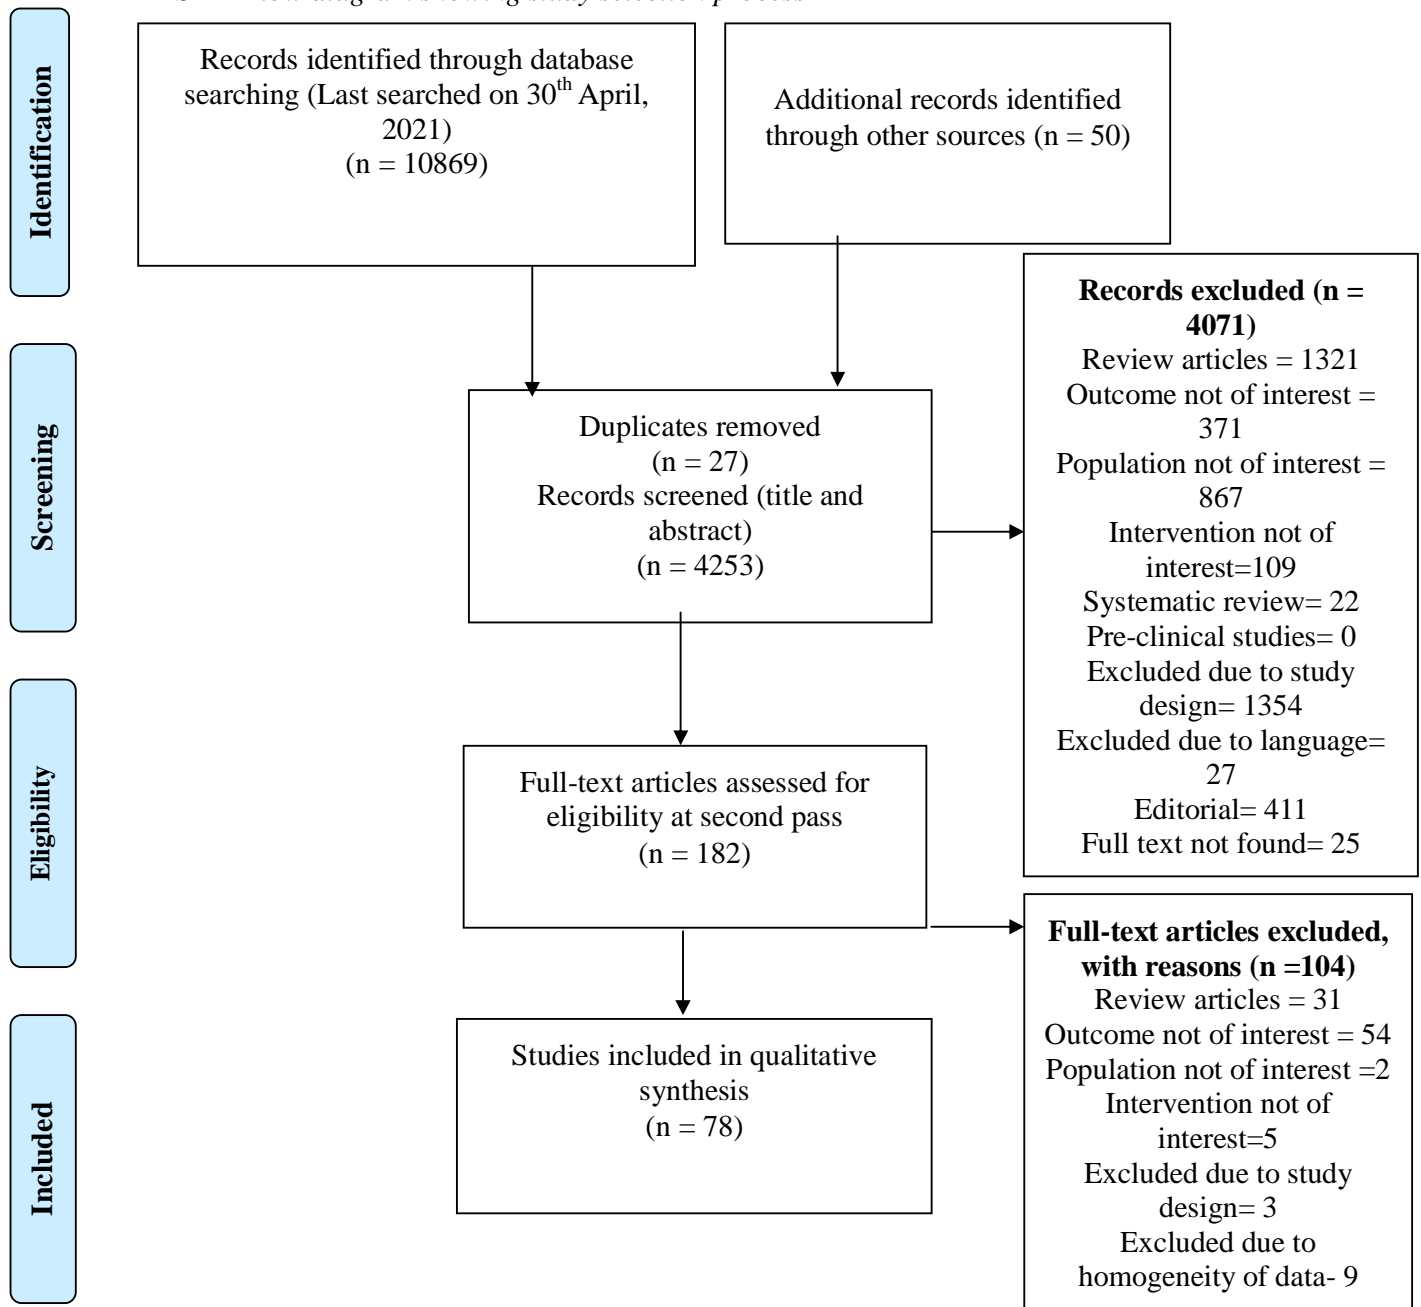

Studies investigating non-hospital-based HCWs, published in languages other than English or having fewer than 20 participants, and editorials or protocols were excluded.

### **2.3 Data derivation and evaluation of study trait**

To extract the desirable data, structured format was used and information such as study country, population size, type of mental health, measurement tool used for mental health, severity of outcome, and prevalence rate were tabulated.

### **2.4 Outcomes**

The objective of this systematic review was to assess the prevalence of depression, anxiety, insomnia, stress and distress among FHW during COVID-19..

## **3. RESULTS**

### **3.1 Literature search**

Initially, 10,919 records were found. Out of these, 27 duplicates were removed and 4253 potential studies (title and abstract) were screened. Further, after the exclusion of 4071 articles, full texts of 182 articles were assessed.. Finally, 78 articles were included in the study (Fig. 1) (AlAteeq et al., 2020; Thamer H Alenazi et al., 2020; Alshekaili et al., 2020a; Altintas, 2017; An et al., 2020; Antonijevic et al., 2020a; Ayhan Başer et al., 2020; Azoulay et al., n.d.; Bhargava et al., 2020; Buselli et al., 2020; Caillet et al., 2020a; X. Chen et al., 2020; Kannampallil et al., 2020; Keubo et al., 2020; Liu et al., 2020) (Altintas, 2017)(AlAteeq et al., 2020; Thamer H Alenazi et al., 2020; Alshekaili et al., 2020a)(An et al., 2020; Antonijevic et al., 2020b; Ayhan Başer et al., 2020; Azoulay et al., n.d.; Bhargava et al., 2020; Buselli et al., 2020; Caillet et al., 2020a; X. Chen et al., 2020; Liu et al., 2020)(W. Cai et al., 2020; J. Chen et al., 2020; Q. Chen et al., 2020; X. Chen et al., 2020; Cheng et al., 2020; Chew et al., 2020; Di Tella et al., 2020; Elbay et al., 2020b; Elhadi et al., 2020b; Fadhli et al., n.d.; Gallopeni et al., 2020; Herrero San Martin et al., 2020; Hong et al., 2020; Huang



and Zhao, 2020; Janati Idrissi et al., 2020; Johnson et al., 2020; Kang et al., 2020a; Kannampallil et al., 2020; Keubo et al., 2020; Koksai et al., 2020a; Korkmaz et al., 2020; Labrague and De los Santos, 2020; J. Lai et al., 2020; G. Li et al., 2020; R. Li et al., 2020; Liang et al., 2020; M. Liu et al., 2020; Y. Liu et al., 2020a; Lu et al., 2020; Luceño-Moreno et al., 2020; Nie et al., 2020; Ning et al., 2020; Prasad et al., 2020; Que et al., 2020; Rossi et al., 2020; Şahin et al., 2020a; Salopek-Žiha et al., 2020; Sandesh et al., 2020; Shah et al., 2020; Shahrour and Dardas, 2020; Shechter et al., 2020; Si et al., 2020; Skoda et al., 2020; Stojanov et al., 2020; Suryavanshi et al., 2020; Teo et al., 2020; Tian et al., 2020; Wang et al., 2020, 2020; L. Q. Wang et al., 2020; Wańkiewicz et al., 2020; Wilson et al., 2020; Xiao et al., 2020; Xing et al., 2020; Yáñez et al., 2020; Yang et al., 2020a; Yin et al., 2020; W. R. Zhang et al., 2020)

### **3.2 Study characteristics**

Seventy-eight studies met the inclusion criteria for this systematic review. All studies quantitatively synthesize data of the psychological illness such as anxiety, depression, stress disorders, insomnia and PTSD affecting FHW due to COVID-19.

Out of 78 studies, 35 were from China; 4 studies were conducted in USA and Turkey; 3 studies were from Saudi Arabia and Italy; 2 studies were from Serbia, Singapore, Pakistan and India; 1 study each from Oman, Malaysia, Kosovo, Morocco, Norway, Cameroon, Philippines, Croatia, Jordan, Germany, Poland, Peru, Iran and United Kingdoms. One study included the dermatologists from all the continents- Asia, North America, Europe and others. (Altintas, 2017)(An et al., 2020)(Q. Chen et al., 2020; X. Chen et al., 2020; Cheng et al., 2020)(G. Li et al., 2020; Wang et al., 2020)(Huang and Zhao, 2020; Juan et al., 2020; Wang et al., 2020)(Kang et al., 2020b; J. Lai et al., 2020; X. Lai et al., 2020; Liang et al., 2020; Liu et al., 2020; Y. Liu et al., 2020b)(Liu et al., 2020; Nie et al., 2020; Ning et al., 2020; L. Q. Wang et al., 2020), (Tian et al., 2020)(W. Cai et al., 2020; Xiao et al., 2020)(Si et al., 2020;

Xiaoming et al., 2020)(Y. Liu et al., 2020b; Xiaoming et al., 2020; Xing et al., 2020; Yang et al., 2020b)(Yin et al., 2020; M. Zhan et al., 2020; S. X. Zhang et al., 2020; Yifang Zhou et al., 2020)(B. Zhou et al., 2020; Zhou et al., 2020, 2020; Yifang Zhou et al., 2020; Z. Zhu et al., 2020b).(Civantos et al., 2020; Kannampallil et al., 2020; Prasad et al., 2020; Shechter et al., 2020)(Ayhan Başer et al., 2020; Koksall et al., 2020b; Korkmaz et al., 2020)(Şahin et al., 2020b)(Buselli et al., n.d.; Di Tella et al., 2020; Rossi et al., 2020)(AlAteeq et al., 2020; Thamer H Alenazi et al., 2020)

Sample size of the study ranged from 107 (Altintas, 2017) – 8817 (Xiaoming et al., 2020) with an average age of 19- 60< years.

### **3.3 Risk of Bias assessment/ Quality assessment**

The quality of included articles was assessed using Newcastle-Ottawa Scale (NOS). To remove the risk of bias, quality assessment was done by two authors (RJ and MAK) independently. The quality was based on three categories i.e., selection, comparability and outcome consisting of 7 questions. In this, a study can be awarded a maximum of one star for each numbered item within the Selection and Exposure categories. A maximum of two stars can be given for Comparability. Later, stars of specific question can be added later or total score would be the number of stars given to the specific set of questions in a category. Scores ranging 7-10 were deemed to be of high quality, 6-7 represent medium quality and 1-6 were considered to be of low quality (**Table-1**).

**Table 1**

*Quality of assessment table*

| Sno. | Author and year of study                          | Selection | Comparability | Outcome | Total | Quality of the study |
|------|---------------------------------------------------|-----------|---------------|---------|-------|----------------------|
| 1    | (Altintas, 2017), 2017, Saudi Arabia              | 4         | 2             | 3       | 9     | High                 |
| 2    | (Alshekaili et al., 2020b)Oman                    | 4         | 2             | 3       | 9     | High                 |
| 3    | (AlAteeq et al., 2020),2020, Saudi Arabia         | 4         | 2             | 3       | 9     | High                 |
| 4    | (Thamer H Alenazi et al., 2020)2020, Saudi Arabia | 5         | 2             | 2       | 9     | High                 |
| 5    | (An et al., 2020)2020 China                       | 5         | 2             | 3       | 10    | High                 |

|    |                                                                                          |   |   |   |   |      |
|----|------------------------------------------------------------------------------------------|---|---|---|---|------|
| 6  | (Antonijevic et al., 2020a)2020, Serbia                                                  | 4 | 2 | 2 | 9 | High |
| 7  | (Ayhan Başer et al., 2020)2020, TURKEY                                                   | 4 | 1 | 2 | 7 | Low  |
| 8  | (Azoulay et al., n.d.)2020, France                                                       | 5 | 1 | 3 | 9 | High |
| 9  | (Bhargava et al., 2020)2020, Asia, North America, Central/ south America, Europe, Other. | 4 | 2 | 2 | 8 | High |
| 10 | (Buselli et al., n.d.)2020, ITALY                                                        | 4 | 1 | 2 | 7 | Low  |
| 11 | (W. Cai et al., 2020), 2020, China                                                       | 5 | 1 | 2 | 8 | High |
| 12 | (Caillet et al., 2020a)2020, France                                                      | 5 | 2 | 2 | 9 | High |

|    |                                           |   |   |   |   |      |
|----|-------------------------------------------|---|---|---|---|------|
| 13 | (Liu et al., 2020),<br>2020, China        | 5 | 2 | 2 | 9 | High |
| 14 | (Civantos et al.,<br>2020)2020, US        | 4 | 2 | 2 | 8 | High |
| 15 | (Cheng et al.,<br>2020).2020, China       | 4 | 1 | 3 | 8 | High |
| 16 | (Chew et al.,<br>2020)2020,<br>Singapore  | 5 | 2 | 2 | 9 | High |
| 17 | (Di Tella et al.,<br>2020)2020, Italy     | 5 | 1 | 3 | 9 | High |
| 18 | (Elhadi et al.,<br>2020a)2020, Libya      | 4 | 2 | 2 | 8 | High |
| 19 | (Fauzi et al.,<br>2020)2020,<br>Malaysia. | 5 | 1 | 2 | 8 | High |
| 20 | (Galopeni et al.,<br>2020)2020, Kosovo    | 4 | 2 | 2 | 8 | High |
| 21 | (G. Li et al.,<br>2020)2020, China        | 4 | 1 | 3 | 8 | High |

|    |                                              |   |   |   |    |      |
|----|----------------------------------------------|---|---|---|----|------|
| 22 | (Herrero San Martin et al., 2020)2020, Spain | 5 | 1 | 2 | 8  | High |
| 23 | (Wang et al., 2020), 2020, China             | 5 | 2 | 3 | 10 | High |
| 24 | (Hong et al., 2020)2020, China               | 5 | 2 | 2 | 9  | High |
| 25 | (J. Zhu et al., 2020)2020, China             | 5 | 2 | 2 | 9  | High |
| 26 | (Huang and Zhao, 2020)2020, China            | 5 | 1 | 2 | 8  | High |
| 27 | (Janati Idrissi et al., 2020)2020, Morocco   | 5 | 1 | 1 | 7  | Low  |
| 28 | (Juan et al., 2020), 2020, China             | 4 | 2 | 2 | 8  | High |
| 30 | (Kang et al., 2020a)China                    | 5 | 1 | 2 | 8  | High |

|    |                                                |   |   |   |   |      |
|----|------------------------------------------------|---|---|---|---|------|
| 31 | (Kannampallil et al., 2020)USA                 | 4 | 2 | 2 | 8 | High |
| 32 | (Keubo et al., 2020), 2020, Cameroon           | 5 | 1 | 3 | 9 | High |
| 33 | (Koksal et al., 2020a), 2020, Turkey           | 4 | 2 | 3 | 9 | High |
| 34 | (Korkmaz et al., 2020)Turkey                   | 4 | 2 | 2 | 8 | High |
| 35 | (Labrague and De los Santos, 2020) Philippines | 4 | 2 | 3 | 9 | High |
| 36 | (J. Lai et al., 2020) , 2020, China            | 4 | 2 | 2 | 8 | High |
| 37 | (Lee et al., 2020) Singapore                   | 4 | 1 | 2 | 7 | Low  |
| 38 | (Liang et al., 2020), 2020 China               | 4 | 2 | 3 | 9 | High |
| 39 | (Lu et al., 2020), 2020, China                 | 4 | 1 | 2 | 7 | Low  |

|    |                                          |   |   |   |    |      |
|----|------------------------------------------|---|---|---|----|------|
| 40 | (Luceño-Moreno et al., 2020) 2020, Spain | 4 | 2 | 2 | 8  | High |
| 41 | (L. Q. Wang et al., 2020)2020, China     | 4 | 1 | 2 | 7  | Low  |
| 42 | (Nie et al., 2020) 2020, China           | 4 | 1 | 2 | 7  | Low  |
| 43 | (Ning et al., 2020)2020, China           | 5 | 1 | 2 | 8  | High |
| 44 | (Pouralizadeh et al., 2020)2020, Iran    | 5 | 2 | 3 | 10 |      |
| 45 | (Prasad et al., 2020)2020, USA           | 4 | 1 | 3 | 8  | High |
| 46 | (Q. Chen et al., 2020),2020, China       | 5 | 2 | 3 | 10 | High |
| 47 | (Que et al., 2020) 2020, China           | 5 | 1 | 2 | 8  | High |



|    |                                             |   |   |   |   |      |
|----|---------------------------------------------|---|---|---|---|------|
| 48 | (R. Li et al., 2020),<br>2020, China        | 5 | 1 | 3 | 9 | High |
| 49 | (Rossi et al.,<br>2020)2020, Italy          | 4 | 1 | 2 | 7 | Low  |
| 50 | (Şahin et al.,<br>2020a)2020, Turkey        | 5 | 1 | 2 | 8 | High |
| 51 | (Salopek-Žiha et al.,<br>2020)2020, Croatia | 5 | 2 | 2 | 9 | High |
| 52 | (Sandesh et al.,<br>2020)2020, Pakistan     | 4 | 2 | 2 | 8 | High |
| 53 | (Shah et al.,<br>2020)2020, UK              | 5 | 1 | 3 | 9 | High |
| 54 | (Shahrour,<br>2020)2020, Jordan             | 4 | 2 | 2 | 8 | High |
| 55 | (Shechter et al.,<br>2020) 2020, NYC        | 5 | 1 | 2 | 8 | High |

|    |                                             |   |   |   |    |      |
|----|---------------------------------------------|---|---|---|----|------|
| 56 | (Si et al., 2020),<br>2020, China           | 5 | 1 | 3 | 9  | High |
| 57 | (Skoda et al.,<br>2020)2020.,<br>Germany    | 5 | 2 | 3 | 10 | High |
| 58 | (Stojanov et al.,<br>2020)2020, Serbia      | 5 | 2 | 2 | 9  | High |
| 59 | (Suryavanshi et al.,<br>2020)2020, India    | 4 | 2 | 2 | 8  | High |
| 60 | (Wang et al., 2020)<br>2020, China          | 4 | 1 | 2 | 7  | Low  |
| 61 | (Tian et al.,<br>2020)2020, China           | 5 | 1 | 3 | 9  | High |
| 62 | (Wasim et al.,<br>2020), 2020,<br>Pakistan. | 4 | 2 | 2 | 8  | High |

|    |                                       |   |   |   |    |      |
|----|---------------------------------------|---|---|---|----|------|
| 63 | (Wańkiewicz et al., 2020)2020, Poland | 4 | 1 | 3 | 8  | High |
| 64 | (Wilson et al., 2020), 2020, India    | 5 | 2 | 2 | 9  | High |
| 65 | (X. Chen et al., 2020) 2020, China    | 5 | 2 | 2 | 9  | High |
| 66 | (Xiao et al., 2020), 2020, China      | 4 | 1 | 2 | 7  | Low  |
| 67 | (Xiaoming et al., 2020)2020 China     | 5 | 2 | 3 | 10 | High |
| 68 | (Xing et al., 2020), 2020, China      | 4 | 2 | 2 | 8  | High |
| 69 | (Yang et al., 2020a)2020, China       | 5 | 2 | 2 | 9  | High |
| 70 | (Yáñez et al., 2020), 2020, Peru      | 4 | 1 | 2 | 7  | Low  |
| 71 | (Y. Liu et al., 2020b), 2020, China   | 5 | 2 | 2 | 9  | High |

|    |                                            |   |   |   |    |      |
|----|--------------------------------------------|---|---|---|----|------|
| 72 | (Yin et al., 2020),<br>2020, China         | 4 | 1 | 2 | 7  | Low  |
| 73 | (Zhan et al., 2020),<br>2020, China        | 5 | 2 | 3 | 10 | High |
| 74 | (Y. Wang et al.,<br>2020a), 2020, China    | 5 | 1 | 3 | 9  | High |
| 75 | (Yifang Zhou et al.,<br>2020)China         | 4 | 2 | 2 | 8  | High |
| 76 | (W. R. Zhang et al.,<br>2020), 2020, China | 5 | 1 | 3 | 9  | High |
| 77 | (Z. Zhu et al.,<br>2020a),2020, China      | 4 | 2 | 3 | 8  | High |
| 78 | (Zhou et al.,<br>2020)2020, China          | 4 | 2 | 2 | 8  | High |

### 3.4 Depression and Anxiety

Out of 78 studies, 56 articles discussed about the anxiety and depression, suffered by the FHW staff (**Table 2**).

The mental health data assessed by (An et al., 2020) reported prevalence of depression in junior nurses and tertiary hospital to be 66.1% and 89.8%, respectively. Another study reported that nurses suffered from depression and anxiety more as compared to doctors 71.8%, 16.7% and 70%, 19.1%, respectively. (Zhu et al, 2020). A similar study was conducted by Xiao et al., 2020 reported prevalence of depression/anxiety in nurses (62.4%/58.5%) more as compared to doctors (53.7%/49.5%). As per (Wankovicz et al., 2020), 99.51% FHW had PHQ-9  $\geq 4$  and 99.03% staff had GAD-7  $\geq 4$ . Another study used same scale and reported prevalence rate of depression and anxiety to be 90.92% and 73.46% (Pouralizadeh et al., 2020). Cross-sectional study conducted by Sahin et al., 2020 estimated that 77.6% of HCW had depression 60.2% had anxiety. Another study used DASS-21 scale to measure anxiety and depression and reported that 72.3% HCWs had depression whereas 85.7% had moderately- extreme severe anxiety (Sandesh et al., 2020). A study reported that 82.31% of HCW suffered from depression and 61.40 % had anxiety (Liang et al., 2020). Lee et al, 2020 reported HADS-D  $>11$  was 39.3% and  $< 11$  was 18.1% and HADS-A  $> 11$  was 19.2% and  $<11$  was 38.1% in physicians, HADS-D $<11$  was 11% and  $> 11$  was 30.7% for HADS-A  $>11$  was 11% and  $< 11$  was 31.4% (Lee et al., 2020) (**Table 2**).

There were 7 studies which solely analyzed the occurrence of anxiety in FHW due to COVID-19. Alenazi et al., 2020 reported the overall prevalence of anxiety in nursing group three times (27.90%) than medicine group (9.91%). A similar study showed the prevalence of anxiety in nurses (35.98%) to be more as compared to doctors (25.26%) by having 35.98% of anxiety (X. Yang et al, 2020). Another study showed that overall 39.81% healthcare employees had anxiety, from which 53.3% suffered severe, 40.4% moderate and 38.2% mild

anxiety (Ayhan baser et al., 2020). Another study conducted in Philippines reported that 37.8% nurses had anxiety (Labrague and De los Santos, 2020). (Korkmaz et al., 2020) revealed that 70.71% healthcare workers experienced anxiety out of which 13% had severe anxiety, 20% had moderate and 38% mild levels of anxiety. According to Liang et al., 2020 and liu et al, 2020 HCWs experienced 12.5% of anxiety. (**Table 2**).

**Table 2**

*Summary of characteristics of included studies*

| S. No | Study characteristics                |                                                                                   | Outcome characteristics               |                                   |                                                      |                | Findings                                                                                |                                                                                                                                   |                                                                                              |
|-------|--------------------------------------|-----------------------------------------------------------------------------------|---------------------------------------|-----------------------------------|------------------------------------------------------|----------------|-----------------------------------------------------------------------------------------|-----------------------------------------------------------------------------------------------------------------------------------|----------------------------------------------------------------------------------------------|
|       | Study country (Year)                 | population size (Sex)                                                             | Type of mental health                 | Measurement tool (range of score) | Definition of outcomes                               | Measures       | Total                                                                                   | By severity of outcome                                                                                                            | % of morbidity in FL HCWs                                                                    |
| 1     | (Altintas, 2017), 2020, Saudi Arabia | 107 (M+F)<br>Residents- 61.7%<br>Fellow- 9.3%<br>Registrar and consultants- 29.0% | Anxiety, depression, insomnia, stress | PHQ-9, GAD-7, ISI, PSS            | PHQ-9 (0-27) GAD-7 (0-27) ISI-7 (0-21) PSS-10 (0-40) | Prevalence (%) | <b>All healthcare workers</b><br>Depression- 50.5%<br>Anxiety- 46.5%<br>Insomnia- 44.9% | <b>PSS (Stress)</b><br>Low- 28%<br>Moderate- 68.2%<br>High- 3.7%<br><b>ISI (Insomnia)</b><br>Sub-threshold- 29.9% moderate- 13.1% | <b>Frontline healthcare workers</b><br>PHQ-9- 31.9%<br>GAD-7- 43.5%<br>ISI- 18.8% PSS- 24.6% |

medRxiv preprint doi: <https://doi.org/10.1101/2021.11.09.21266105>; this version posted November 11, 2021. The copyright holder for this preprint (which was not certified by peer review) is the author/funder, who has granted medRxiv a license to display the preprint in perpetuity. It is made available under a CC-BY-NC-ND 4.0 International license.

|   |                                        |                                                     |                              |              |                              |                       |           |                                                                                                                                                                                                               |                                          |
|---|----------------------------------------|-----------------------------------------------------|------------------------------|--------------|------------------------------|-----------------------|-----------|---------------------------------------------------------------------------------------------------------------------------------------------------------------------------------------------------------------|------------------------------------------|
|   |                                        |                                                     |                              |              |                              |                       |           | severe- 1.9%<br><b>PHQ-9<br/>(Depression)</b><br>mild- 21.5%<br>moderate- 17.8%<br>moderately<br>severe- 7.5%<br>severe- 3.7%<br><b>GAD-7<br/>(Anxiety)</b><br>mild- 25.2%<br>moderate- 15.9%<br>severe- 5.6% |                                          |
| 2 | (Alshekaili et al., 2020b) <b>Oman</b> | <b>1139 (M+F)</b><br>Physicians- 384<br>Nurses- 449 | Anxiety, depression, stress, | DASS-21, ISI | DASS-21 (0-42)<br>ISI (0-28) | <b>Prevalence (%)</b> | <b>NR</b> | NR                                                                                                                                                                                                            | <b>Healthcare workers</b><br>Depression- |



|   |                                           |                                                                                                                                     |                     |              |                           |                |    |                                                                                                                                                                                                                   |                                                             |
|---|-------------------------------------------|-------------------------------------------------------------------------------------------------------------------------------------|---------------------|--------------|---------------------------|----------------|----|-------------------------------------------------------------------------------------------------------------------------------------------------------------------------------------------------------------------|-------------------------------------------------------------|
|   |                                           | Allied health- 305                                                                                                                  | insomnia            |              |                           |                |    |                                                                                                                                                                                                                   | 32.3%<br>Anxiety- 34.1%<br>Stress- 23.8%<br>Insomnia- 18.5% |
| 3 | (AlAteeq et al., 2020),2020, Saudi Arabia | 502 (M+F)<br>Physician- 111<br>Nurse- 132<br>Administrator- 143<br>Pharmacist- 12<br>Non-physician specialist- 70<br>Technician- 34 | Depression, anxiety | GAD-7. PHQ-9 | GAD-7 (0-21) PHQ-9 (0-27) | Prevalence (%) | NR | <b>Depression</b><br><b>Mild- 24.9%</b><br><b>moderate- 14.5%</b><br><b>moderately severe- 10%</b><br><b>severe- 5.8%</b><br><b>Anxiety</b><br><b>mild- 25.1%</b><br><b>moderate- 11%</b><br><b>severe- 15.3%</b> | <b>Depression</b><br>55.20%<br><b>Anxiety</b><br>51.40%     |

|   |                                                   |                                                                                                                                                                                                          |         |              |                         |                |                                 |                                                                                                                                                                                                                               |                                                                                    |
|---|---------------------------------------------------|----------------------------------------------------------------------------------------------------------------------------------------------------------------------------------------------------------|---------|--------------|-------------------------|----------------|---------------------------------|-------------------------------------------------------------------------------------------------------------------------------------------------------------------------------------------------------------------------------|------------------------------------------------------------------------------------|
| 4 | (Thamer H Alenazi et al., 2020)2020, Saudi Arabia | <b>4920 (M+F)</b><br>Medicine- 734<br>Nursing- 1913<br>Pharmacy- 580<br>Medical laboratories- 365<br>Dentistry- 299<br>Radiology- 193<br>Physical therapy- 107<br>Respiratory therapy- 52<br>Others- 677 | Anxiety | GAD-7, PHQ-9 | GAD-7 (0-21) PHQ (0-27) | Prevalence (%) | <b>Total anxiety-</b><br>68.45% | <b>Medicine group Anxiety</b><br>Low- 15.9%<br>Medium – 15.3%<br>High- 13.6%<br><b>Nursing Anxiety</b><br>low- 34.8%<br>medium – 36.2%<br>high- 45.9%<br><b>Dentistry Anxiety</b><br>low- 6.1%<br>medium – 6.2%<br>high- 5.6% | <b>Medicine group</b><br>Anxiety- 9.91%<br><b>Nursing group</b><br>Anxiety- 27.90% |
|---|---------------------------------------------------|----------------------------------------------------------------------------------------------------------------------------------------------------------------------------------------------------------|---------|--------------|-------------------------|----------------|---------------------------------|-------------------------------------------------------------------------------------------------------------------------------------------------------------------------------------------------------------------------------|------------------------------------------------------------------------------------|

|   |                                   |                                         |            |            |                              |                |  |                                                                                             |                                                                                                                                                                                                                                           |
|---|-----------------------------------|-----------------------------------------|------------|------------|------------------------------|----------------|--|---------------------------------------------------------------------------------------------|-------------------------------------------------------------------------------------------------------------------------------------------------------------------------------------------------------------------------------------------|
| 5 | (An et al., 2020)<br><b>China</b> | <b>1103 (M)</b><br>ED nurses-<br>43.61% | Depression | PHQ-9, QoL | PHQ-9 (0-27)<br>QOL (16-112) | Prevalence (%) |  | <b>Depression</b><br>Mild- 27.7%<br>Moderate- 8.6%<br>Moderate-severe- 5.3%<br>Severe- 2.1% | <b>Junior nurses</b><br>Depression- 66.1%<br>No depression 69.0%<br><b>Participation in treating patients-</b><br>Depression- 16.4%<br>No depression 16.9%<br><b>Working in tertiary hospitals-</b><br>Depression- 89.8%<br>no depression |
|---|-----------------------------------|-----------------------------------------|------------|------------|------------------------------|----------------|--|---------------------------------------------------------------------------------------------|-------------------------------------------------------------------------------------------------------------------------------------------------------------------------------------------------------------------------------------------|

|   |                                              |                                                            |                                         |                    |                                       |                |                                                                               |                                                                                                                                                                              |                                                                                                                        |
|---|----------------------------------------------|------------------------------------------------------------|-----------------------------------------|--------------------|---------------------------------------|----------------|-------------------------------------------------------------------------------|------------------------------------------------------------------------------------------------------------------------------------------------------------------------------|------------------------------------------------------------------------------------------------------------------------|
|   |                                              |                                                            |                                         |                    |                                       |                |                                                                               |                                                                                                                                                                              | 85.0%<br><b>working inpatient services-</b><br><br>Depression- 36.8%<br><br>No depression- 32.2%                       |
| 6 | (Antonišević et al., 2020a)<br><b>Serbia</b> | <b>1678 (M+F)</b><br>Medical personnel- 684<br>Others- 994 | Anxiety, depression, stress, resilience | PSS, GAD-7, BDI-IA | GAD-7 (0-21) PSS (0-40) BDI-IA (0-63) | Prevalence (%) | Stress- 62.51%<br>Anxiety- 52.26%<br>Depression- 24.97%<br>Resilience- 55.36% | <b>Frontline medical personnel</b><br><br><b>Stress</b><br>low- 25.15%<br>moderate- 41.72%<br>high- 33.13%<br><b>Anxiety</b><br>minimal- 28.39%<br>mild- 33.35%<br>moderate- | <b>Frontline medical personnel</b><br><br>Stress- 15.36%<br>Anxiety- 14.44%<br>Depression- 6.07%<br>Resilience- 10.33% |

|   |                                                |                                                         |         |     |                                                       |                       |  |                                                                                                                                                                                                                                              |                                                          |
|---|------------------------------------------------|---------------------------------------------------------|---------|-----|-------------------------------------------------------|-----------------------|--|----------------------------------------------------------------------------------------------------------------------------------------------------------------------------------------------------------------------------------------------|----------------------------------------------------------|
|   |                                                |                                                         |         |     |                                                       |                       |  | <p>16.13%</p> <p>severe- 21.94%</p> <p><b>Depression</b></p> <p>minimal- 68.24%</p> <p>mild- 18.24%</p> <p>moderate- 10.14%</p> <p>severe- 3.38%</p> <p><b>Resilience</b></p> <p>low- 44.83%</p> <p>moderate- 40.00%</p> <p>high- 15.17%</p> |                                                          |
| 7 | (Ayhan Başer et al., 2020) <b>2020, TURKEY</b> | <b>1070 (M+F)</b><br>Health employees-426<br>Others-644 | Anxiety | BAI | BAI (0-63)<br>Min- 0-7<br>Mild- 8-15<br>Moderate- 16- | <b>Prevalence (%)</b> |  | <p>Healthcare employees</p> <p>ANXIETY</p> <p>Mild- 38.2%</p> <p>Moderate- 40.4%</p>                                                                                                                                                         | <p><b>Healthcare employees</b></p> <p>Anxiety- 39.8%</p> |

medRxiv preprint doi: <https://doi.org/10.1101/2021.11.09.21266105>; this version posted November 11, 2021. The copyright holder for this preprint (which was not certified by peer review) is the author/funder, who has granted medRxiv a license to display the preprint in perpetuity. It is made available under a CC-BY-NC-ND 4.0 International license.

|   |                                            |                                                                                                                                                   |                                                 |            |                           |                       |                                                                                                  |               |                                                                                                                                                                                                                               |
|---|--------------------------------------------|---------------------------------------------------------------------------------------------------------------------------------------------------|-------------------------------------------------|------------|---------------------------|-----------------------|--------------------------------------------------------------------------------------------------|---------------|-------------------------------------------------------------------------------------------------------------------------------------------------------------------------------------------------------------------------------|
|   |                                            |                                                                                                                                                   |                                                 |            | 25<br>Severe- 26-<br>63   |                       |                                                                                                  | Severe- 53.3% |                                                                                                                                                                                                                               |
| 8 | (Azoulay et al., n.d.) <b>2020, France</b> | <b>1058 (F)</b><br>Nurses- 498<br>Nursing Assistants- 223<br>Senior Physicians- 204 Residents- 78<br>Medical students- 25 other professionals- 27 | Anxiety, Depression, Peritraumatic dissociation | HADS, PDEQ | PDEQ (0-4)<br>HADS (0-21) | <b>Prevalence (%)</b> | All Healthcare workers<br>Anxiety- 50.4%<br>Depression- 30.4%<br>peritraumatic dissociation- 32% | NR            | <b>Nurses</b><br>Anxiety- 50%<br>Depression- 31.6%<br>Peritraumatic dissociation- 40%<br><b>Senior physicians</b><br>Anxiety- 46.6%<br>depression- 25%<br>Peritraumatic dissociation- 20%<br><b>residents</b><br>Anxiety- 41% |

|    |                                                                                          |                                  |                                                   |                                                                                                                          |                    |                |                                        |    |                                                                                                |
|----|------------------------------------------------------------------------------------------|----------------------------------|---------------------------------------------------|--------------------------------------------------------------------------------------------------------------------------|--------------------|----------------|----------------------------------------|----|------------------------------------------------------------------------------------------------|
|    |                                                                                          |                                  |                                                   |                                                                                                                          |                    |                |                                        |    | Depression-<br>19.2%<br><br>Peritraumatic<br>dissociation-<br>15.4%                            |
| 9  | (Bhargava et al., 2020)2020, Asia, North America, Central/ south America, Europe, Other. | 733 (M+F)<br>Dermatologists-733  | Anxiety, depression, insomnia, stress, irritation | Survey questions were made and survey instrument was sent electronically. Participants accessed the survey via the link. | NR                 | Prevalence (%) | Total psychological outcomes-<br>77.2% | NR | Dermatologists<br>Stress- 73.9%<br>Irritability- 30.7%<br>Insomnia- 30.8%<br>Depression- 27.6% |
| 10 | (Buselli et al., n.d.)2020,                                                              | 265 (M+F)<br>Medical doctors- 85 | Depression, anxiety                               | ProQOL-5, GAD-7, PHQ-                                                                                                    | GAD-7 (0-21) PHQ-9 | Prevalence (%) | Prevalence (%)                         | NR | Frontline HCWs<br>Anxiety- 23.2%                                                               |

|    |                                           |                                                                                     |                                                              |                        |                                                |                |  |    |                                                                                                                        |
|----|-------------------------------------------|-------------------------------------------------------------------------------------|--------------------------------------------------------------|------------------------|------------------------------------------------|----------------|--|----|------------------------------------------------------------------------------------------------------------------------|
|    | <b>ITALY</b>                              | Nurses- 133<br>Healthcare assistants- 47                                            |                                                              | 9                      | (0-27)                                         |                |  |    | Depression- 22.8%                                                                                                      |
| 11 | (W. Cai et al., 2020), <b>2020, China</b> | <b>1521 (M+F)</b><br>Doctor- 511<br>Nurses- 546<br>Technician- 45<br>Pharmacist- 72 | Somatization, obsessive-compulsion, depression, anxiety etc. | SLC-90, CD-RISC, SSRS. | SCL-90 (0-4)<br>CD-RISC (0-100)<br>SSRS (0-50) | Prevalence (%) |  | NR | <b>Frontline healthcare workers</b><br><b>Prevalence of psychological abnormality</b><br>Doctor- 17.1%<br>Nurse- 13.2% |



|    |                                     |                                                                                                                                                                                                                                                       |                           |             |                             |                |                                                                                                 |    |                                                                                                            |
|----|-------------------------------------|-------------------------------------------------------------------------------------------------------------------------------------------------------------------------------------------------------------------------------------------------------|---------------------------|-------------|-----------------------------|----------------|-------------------------------------------------------------------------------------------------|----|------------------------------------------------------------------------------------------------------------|
| 12 | (Caillet et al., 2020a)2020, France | <b>208 (M+F)</b><br>Nurse anesthetics- 15<br>Care assistant- 41<br>Surface technician- 6<br>Anesthesia nurse student- 1<br>Nurse student- 12<br>Medical student- 8<br>Nurse- 84<br>Intern- 11<br>Physiotherapist- 5<br>Physicians- 17<br>Secretary- 4 | Anxiety, Depression, PTSD | HADS, IES-R | IES-R (0-88)<br>HADS (0-21) | Prevalence (%) | <b>All Healthcare workers</b><br>Anxiety- 48%<br>Depression- 16%<br>PTSD- 27%<br>Burnout- 10.0% | NR | <b>Nurse</b><br>Anxious- 55%<br>Non-anxious- 45%<br><b>Physicians-</b><br>Anxious- 41%<br>Non-anxious- 59% |
|----|-------------------------------------|-------------------------------------------------------------------------------------------------------------------------------------------------------------------------------------------------------------------------------------------------------|---------------------------|-------------|-----------------------------|----------------|-------------------------------------------------------------------------------------------------|----|------------------------------------------------------------------------------------------------------------|

It is made available under a [CC-BY-NC-ND 4.0 International license](https://creativecommons.org/licenses/by-nc-nd/4.0/).

|    |                                 |                                                                                            |                              |                                    |                                                                        |                |  |                                                                                                                                                       |                                                                                                                                                 |
|----|---------------------------------|--------------------------------------------------------------------------------------------|------------------------------|------------------------------------|------------------------------------------------------------------------|----------------|--|-------------------------------------------------------------------------------------------------------------------------------------------------------|-------------------------------------------------------------------------------------------------------------------------------------------------|
| 13 | (Liu et al., 2020), 2020, China | <b>512 (M+F)</b><br>Clinical department- 369<br>Fever clinic- 68<br>Service/managerial- 75 | Anxiety                      | SAS                                | SAS (20-80)                                                            | Prevalence (%) |  | Anxiety<br>Normal- 87.5%<br>Mild- 10.35%<br>Moderate- 1.36%<br>Severe- 0.78%                                                                          | Healthcare workers<br>Anxiety- 12.5%                                                                                                            |
| 14 | (Civantos et al., 2020)2020, US | <b>349 (M+F)</b><br>Residents= 165<br>Attending physicians= 184                            | Anxiety, depression, burnout | Mini Z burnout scale, GAD-7, IES-R | GAD-7 (0-21)<br>IES-R (0-23)<br>PHQ-2 (0-6)<br>Mini Z assessment (0-5) | Prevalence (%) |  | <b>(Residents and Attending physicians)</b><br>Mini Z burnout symptoms<br>Negative- 78.2%<br>Positive- 21.8%<br>GAD-7<br>Normal- 52.1%<br>Mild- 28.9% | <b>Residents</b><br>Burnout symptoms- 29.7%<br>Anxiety- 50.3%<br>Distress- 58.2%<br>Depression- 10.3%<br><b>Attending physicians</b><br>Burnout |

|  |  |  |  |  |  |  |  |                                                                                                                                                                                                          |                                                                                              |
|--|--|--|--|--|--|--|--|----------------------------------------------------------------------------------------------------------------------------------------------------------------------------------------------------------|----------------------------------------------------------------------------------------------|
|  |  |  |  |  |  |  |  | <p>Moderate- 11.5%</p> <p>Severe- 7.4%</p> <p>IES</p> <p>Subclinical- 39.8%</p> <p>Mild- 32.7%</p> <p>Moderate- 20.9%</p> <p>Severe- 6.6%</p> <p>PHQ-2</p> <p>Positive- 10.6%</p> <p>Negative- 89.4%</p> | <p>symptoms- 14.7%</p> <p>Anxiety- 45.7%</p> <p>Distress- 62.0%</p> <p>Depression- 10.9%</p> |
|--|--|--|--|--|--|--|--|----------------------------------------------------------------------------------------------------------------------------------------------------------------------------------------------------------|----------------------------------------------------------------------------------------------|

|    |                                            |                                                 |                                                           |           |                          |                       |  |                                                                                                                                                                               |                                                                                                |
|----|--------------------------------------------|-------------------------------------------------|-----------------------------------------------------------|-----------|--------------------------|-----------------------|--|-------------------------------------------------------------------------------------------------------------------------------------------------------------------------------|------------------------------------------------------------------------------------------------|
| 15 | (Cheng et al., 2020). <b>2020, China</b>   | <b>534 (M+F)</b><br>Doctors- 289<br>Nurses- 245 | Anxiety                                                   | SAS, PSQI | SAS (20-75), PSQI (0-21) | <b>Prevalence (%)</b> |  | Healthcare workers<br>ANXIETY<br>Mild- 10.7%<br>Moderate- 2.6%<br>Severe- 0.7%                                                                                                | <b>Healthcare workers</b><br>Anxiety- 14.0%<br>Poor sleep 30.0%                                |
| 16 | (Chew et al., 2020) <b>2020, Singapore</b> | <b>906 (M+F)</b>                                | Anxiety, depression, stress, psychological distress, PTSD | DASS-21   | DASS-21 (0-42)           | <b>Prevalence (%)</b> |  | <b>Depression</b><br>Moderate-severe- 5.3%<br><b>anxiety</b><br>Moderate-severe- 8.7%<br><b>stress</b><br>Moderate-severe- 2.2%<br><b>psychological distress</b><br>Moderate- | <b>Healthcare workers</b><br>Depression- 10.6%<br>Anxiety- 15.7%<br>Stress- 5.2%<br>PTSD- 7.4% |

|    |                                         |                                                                                                |                        |                      |                                 |                       |                                                                                |              |                                                                                                  |
|----|-----------------------------------------|------------------------------------------------------------------------------------------------|------------------------|----------------------|---------------------------------|-----------------------|--------------------------------------------------------------------------------|--------------|--------------------------------------------------------------------------------------------------|
|    |                                         |                                                                                                |                        |                      |                                 |                       |                                                                                | severe- 3.8% |                                                                                                  |
| 17 | (Di Tella et al., 2020)<br><b>Italy</b> | <b>145 (M+F)</b>                                                                               | PTSS,<br>Depression    | STAIY1, BD-II, PCL-5 | STAI Y1 (20-80)<br>BD-II (0-60) | <b>Prevalence (%)</b> | <b>Healthcare workers</b><br>STAI Y1- 71.00%<br>BDI-II- 31.00%<br>PCL-5- 26.2% |              | <b>COVID Workers</b><br>Psychological outcomes<br>STAI Y1- 5.5%<br>BDI-II- 13.7%<br>PCL-5- 29.2% |
| 18 | (Elhadi et al., 2020a)<br><b>Libya</b>  | <b>745 (M+F)</b><br>Medical- 265<br>Surgical- 150<br>Emergency medicine-<br>136 Obstetrics and | Anxiety,<br>depression | HADS                 | HADS (0-21)                     | <b>Prevalence (%)</b> |                                                                                | NR           | <b>Healthcare workers</b><br>Anxiety symptoms- 46.7%<br>Depressive symptoms- 56.3%               |

|    |                                     |                                             |                             |                   |                                   |                |  |    |                                                                                     |
|----|-------------------------------------|---------------------------------------------|-----------------------------|-------------------|-----------------------------------|----------------|--|----|-------------------------------------------------------------------------------------|
|    |                                     | gynecology- 49<br>Pediatrics- 76<br>ICU- 69 |                             |                   |                                   |                |  |    |                                                                                     |
| 19 | (Fauzi et al., 2020)2020, Malaysia. | <b>1050 (M+F)</b>                           | Depression, Anxiety, Stress | NASA-TLX, DASS-21 | NASA-TLX (1-20)<br>DASS-21 (0-42) | Prevalence (%) |  | NR | <b>Healthcare workers</b><br>Depression- 30.95%<br>Anxiety- 29.7%<br>Stress- 23.52% |

|    |                                     |                            |                     |      |                                                                   |                |  |                                                                                                                                                                                                                                                                            |                                                                   |
|----|-------------------------------------|----------------------------|---------------------|------|-------------------------------------------------------------------|----------------|--|----------------------------------------------------------------------------------------------------------------------------------------------------------------------------------------------------------------------------------------------------------------------------|-------------------------------------------------------------------|
| 20 | (Galopeni et al., 2020)2020, Kosovo | 592 (M+F)<br>Nurses- 51.4% | Anxiety, depression | HADS | HADS (0-21)<br>Normal- 0-7<br>Borderline- 8-10<br>Abnormal- 11-21 | prevalence (%) |  | <b>Physicians anxiety symptoms</b><br>normal- 3.0%<br>borderline- 20.8%<br>abnormal- 18.9%<br><b>Depressive symptoms</b><br>Normal- 3.2%<br>borderline- 20.4%<br>abnormal- 49.3%<br><b>Nurses Anxiety symptoms</b><br>normal- 4.9%<br>borderline- 23.3%<br>abnormal- 23.1% | <b>Healthcare workers</b><br>Anxiety - 44.6%<br>Depression- 38.7% |
|----|-------------------------------------|----------------------------|---------------------|------|-------------------------------------------------------------------|----------------|--|----------------------------------------------------------------------------------------------------------------------------------------------------------------------------------------------------------------------------------------------------------------------------|-------------------------------------------------------------------|

|    |                                         |                                                                                             |                             |                     |                                                      |                |    |                                                                                                       |                                                                                                                                     |
|----|-----------------------------------------|---------------------------------------------------------------------------------------------|-----------------------------|---------------------|------------------------------------------------------|----------------|----|-------------------------------------------------------------------------------------------------------|-------------------------------------------------------------------------------------------------------------------------------------|
|    |                                         |                                                                                             |                             |                     |                                                      |                |    | <p><b>Depressive symptoms</b></p> <p>Normal- 5.4%</p> <p>borderline- 28.0%</p> <p>abnormal- 17.9%</p> |                                                                                                                                     |
| 21 | (G. Li et al., 2020) <b>2020, China</b> | <p><b>4396 (F)</b></p> <p>Medical technician- 407</p> <p>Nurse- 3380</p> <p>Doctor- 582</p> | Stress, anxiety, Depression | GAD-7, PHQ-9, IES-R | <p>GAD-7(0-21) PHQ-27 (0-27)</p> <p>IES-R (0-88)</p> | Prevalence (%) | NR | NR                                                                                                    | <p><b>Doctors</b></p> <p>Stress- 27.31%</p> <p>Non-stress- 72.69%</p> <p><b>Nurses</b></p> <p>Stress- 33.34%</p> <p>Non-stress-</p> |



|    |                                                      |                                                                            |                               |                      |                                                        |                |                                                                                                 |    |                                                                                                          |
|----|------------------------------------------------------|----------------------------------------------------------------------------|-------------------------------|----------------------|--------------------------------------------------------|----------------|-------------------------------------------------------------------------------------------------|----|----------------------------------------------------------------------------------------------------------|
|    |                                                      |                                                                            |                               |                      |                                                        |                |                                                                                                 |    | 66.66%                                                                                                   |
| 22 | (Herrero San Martin et al., 2020) <b>2020, Spain</b> | <b>170 (M+F)</b><br>Healthcare workers- 100<br>Non- Healthcare workers- 70 | Insomnia                      | ESS, PSQI, ISI, HARS | ESS (0-24)<br>PSQI (0-21)<br>ISI (0-28)<br>HARS (0-56) | Prevalence (%) | <b>Total Insomnia-</b><br>47.65%                                                                | NR | <b>Healthcare workers</b><br><br>Insomnia- 57%                                                           |
| 23 | (Wang et al., 2020), <b>2020, China</b>              | <b>1045 (M+F)</b><br>Doctors- 149<br>Nurse- 773<br>Others- 123             | Anxiety, depression, insomnia | HADS, PSS, ISI       | HADS (0-21)<br>PSS<br>ISI (0-28)                       | Prevalence (%) | <b>Healthcare workers (high risk group)</b><br>Anxiety- 55.4%<br>Depression- 43.6%<br>Insomnia- | NR | <b>Doctors</b><br>Anxiety (HADS-A>10)- 21.1%<br>depression (HADS-D >10)- 17.4%<br>Stress (PSS>29)- 24.2% |

|    |                                     |                                                                   |                                                 |                      |                                |                |       |    |                                                                                                                                                                                                       |
|----|-------------------------------------|-------------------------------------------------------------------|-------------------------------------------------|----------------------|--------------------------------|----------------|-------|----|-------------------------------------------------------------------------------------------------------------------------------------------------------------------------------------------------------|
|    |                                     |                                                                   |                                                 |                      |                                |                | 13.5% |    | <p>Insomnia<br/>(ISI&gt;14)- 11.4%</p> <p><b>Nurses</b></p> <p>Anxiety (HADS-A&gt;10)- 8.6%</p> <p>Depression (HADS-D)- 13.6%</p> <p>Stress (PSS&gt;29)- 21.7%</p> <p>Insomnia (ISI&gt;14)- 11.4%</p> |
| 24 | (Hong et al., 2020)<br><b>China</b> | <b>4692 (M+F)</b><br>Nurses' isolation ward- 381<br>non-isolation | depression, anxiety, somatic symptoms, suicidal | PHQ-9, GAD-7, PHQ-15 | PHQ-9 (0-4) GAD-7 (0-3) PHQ-15 | Prevalence (%) | NR    | NR | <p><b>Healthcare workers</b></p> <p>Depression- 9.4%</p> <p>Anxiety- 8.1%</p>                                                                                                                         |

|    |                                        |                                                                                            |                                                      |                           |                                                    |                |                                                           |    |                                                                                                               |
|----|----------------------------------------|--------------------------------------------------------------------------------------------|------------------------------------------------------|---------------------------|----------------------------------------------------|----------------|-----------------------------------------------------------|----|---------------------------------------------------------------------------------------------------------------|
|    |                                        | ward- 4311<br>direct care of the patients- 506                                             | ideation                                             |                           |                                                    |                |                                                           |    | Somatic symptoms- 42.7%<br>Suicidal ideation- 6.5%                                                            |
| 25 | (J. Zhu et al., 2020)<br><b>China</b>  | <b>165 (M+F)</b><br>Doctors- 70<br>Nurses- 86                                              | anxiety, depression                                  | SAS, SDS                  |                                                    | Prevalence %   | NR                                                        | NR | <b>Doctors</b><br>Anxiety- 11.4%<br>Depression- 45.6%<br><b>Nurses</b><br>Anxiety- 27.5%<br>Depression- 43.0% |
| 26 | (Huang and Zhao, 2020)<br><b>China</b> | <b>7,236 (M+F)</b><br>HW-2250(31.1%)<br>Teachers or students- 1404(19.4%)<br>Enterprise or | Anxiety symptoms, depression symptoms, sleep quality | GAD-7, CES-D, PSQI Scale, | GAD-7 (0-21) CES-D (0-60 points) PSQI scale (0-21) | Prevalence (%) | <b>Total psychological outcomes</b><br>Anxiety symptoms - | NR | <b>Based occupation (group-1)</b><br>Depression- 35.8%                                                        |

|    |                                                                    |                                                                                                                                         |                                                                    |                                                                             |                                          |                   |                                                                          |                                                            |                                                                                                        |
|----|--------------------------------------------------------------------|-----------------------------------------------------------------------------------------------------------------------------------------|--------------------------------------------------------------------|-----------------------------------------------------------------------------|------------------------------------------|-------------------|--------------------------------------------------------------------------|------------------------------------------------------------|--------------------------------------------------------------------------------------------------------|
|    |                                                                    | institution workers-<br>1809(25.0%)<br>Another<br>occupation-<br>1773(24.5%)                                                            |                                                                    |                                                                             |                                          |                   | 35.1%<br><br>depressive<br>symptoms-<br>20.1% sleep<br>quality-<br>18.2% |                                                            | Anxiety- 19.8%<br><br>Poor sleep<br>quality- 73.6%                                                     |
| 27 | (Janati Idrissi<br>et al.,<br>2020) <b>2020,</b><br><b>Morocco</b> | <b>827(M+F)</b><br>Healthcare<br>workers- 282<br><br>institution workers-<br>112<br><br>teachers or<br>students- 305<br><br>others- 115 | sleep<br>disorders,<br>anxiety,<br>depression                      | DBAS-16,<br>AIS, ESS,<br>HARS, BDI                                          | ESS (0-24),<br>HAS (0-56)<br>BDI(0-16)   | Prevalence<br>(%) | NR                                                                       | NR                                                         | <b>Healthcare<br/>workers</b><br><br>Insomnia- 56.0%<br><br>Anxiety- 29.5%<br><br>Depression-<br>35.6% |
| 28 | (Juan et al.,<br>2020), <b>2020,</b><br><b>China</b>               | <b>456 (M+F)</b><br><br>Doctors- 195<br>(42.8) Nurses- 261<br>(57.2)                                                                    | depression,<br>anxiety,<br>somatization<br>obsessive<br>compulsive | IES-R (0-23)<br>PHQ-9 (0-27)<br>GAD-7 (0-21)<br>PHQ-15 (0-30)<br>Y-BOCS (0- | IES-R (0-<br>23)<br><br>PHQ-9 (0-<br>27) | prevalence<br>(%) |                                                                          | <b>Doctors</b><br><br>IES-R-<br><br>Sub-clinical-<br>54.9% | <b>Doctors</b><br><br>IES-R- 19.29%<br><br>GAD-7- 13.81%                                               |

|  |  |  |          |     |               |  |  |                        |                |
|--|--|--|----------|-----|---------------|--|--|------------------------|----------------|
|  |  |  | disorder | 40) | GAD-7 (0-7)   |  |  | mild- 34.4%            | PHQ-9- 12.93%  |
|  |  |  |          |     | PHQ-5 (0-30)  |  |  | moderate-severe- 10.8% | Y-BOCS- 15.78% |
|  |  |  |          |     | Y-BOCS (0-40) |  |  | GAD-7 None- 67.7%      | PHQ-15- 15.13% |
|  |  |  |          |     |               |  |  | mild- 26.2%            | <b>Nurses</b>  |
|  |  |  |          |     |               |  |  | moderate-severe- 6.2%  | IES-R- 23.9%   |
|  |  |  |          |     |               |  |  | PHQ-9 None- 69.7%      | GAD-7- 17.7%   |
|  |  |  |          |     |               |  |  | mild- 23.1%            | PHQ-9- 16.6%   |
|  |  |  |          |     |               |  |  | moderate-severe- 7.2%  | Y-BOCS- 28.28% |
|  |  |  |          |     |               |  |  | Y-BOCS None- 63.1%     | PHQ-15- 18.2%  |
|  |  |  |          |     |               |  |  | mild- 31.8%            |                |
|  |  |  |          |     |               |  |  | moderate-              |                |





|    |                                      |                   |                           |                            |                                              |                |    |                                                                                                                                                                                                                                                                                |                                                                                 |
|----|--------------------------------------|-------------------|---------------------------|----------------------------|----------------------------------------------|----------------|----|--------------------------------------------------------------------------------------------------------------------------------------------------------------------------------------------------------------------------------------------------------------------------------|---------------------------------------------------------------------------------|
| 29 | (Johnson et al., 2020) <b>Norway</b> | <b>1773 (M+F)</b> | PTSD, depression, anxiety | PCL-5, PHQ-9, GAD-7, CAS-1 | PCL-5 (0-80)<br>GAD-7 (0-21)<br>PHQ-9 (0-27) | Prevalence (%) | NR | <b>Direct contact group</b><br>PCL-5 non-clinical- 63.4%<br>subclinical- 22.5%<br>PTSD- 14.1%<br>PHQ-9<br>Normal- 35.6%<br>Mild- 38.3%<br>Moderate- 15.4%<br>Moderate severe- 8.1%<br>Severe- 2.7%<br>GAD-7<br>Normal- 51.0%<br>Mild- 25.2%<br>Moderate- 17.8%<br>Severe- 6.0% | <b>Healthcare workers</b><br>PTSD- 28.9%<br>Anxiety- 21.2%<br>Depression- 20.5% |
|----|--------------------------------------|-------------------|---------------------------|----------------------------|----------------------------------------------|----------------|----|--------------------------------------------------------------------------------------------------------------------------------------------------------------------------------------------------------------------------------------------------------------------------------|---------------------------------------------------------------------------------|



|    |                                        |                                                    |                                                |                          |                                                     |                |    |    |                                                                                                                                                 |
|----|----------------------------------------|----------------------------------------------------|------------------------------------------------|--------------------------|-----------------------------------------------------|----------------|----|----|-------------------------------------------------------------------------------------------------------------------------------------------------|
| 30 | (Kang et al., 2020a) <b>China</b>      | <b>994 (M+F)</b><br>Physicians- 183<br>Nurses- 811 | Depression,<br>Anxiety,<br>Stress              | GAD-7, PHQ-9, ISI, IES-R | PHQ-9 (0-27) GAD-7 (0-21) ISI-7 (0-21) IE-22 (0-88) | Prevalence (%) | NR | NR | <b>Healthcare workers</b><br><br><b>Mental Health disturbances</b><br><br>Sub-threshold 36.9%<br>mild- 34.4%<br>moderate- 22.4%<br>severe- 6.2% |
| 31 | (Kannampallil et al., 2020) <b>USA</b> | <b>393 (F)</b><br>Fellow-132<br>Residents- 261     | Depression,<br>anxiety,<br>stress,<br>Burnout, | DASS-21, PFI             | DASS-21 (0-42)                                      | prevalence (%) | NR | NR | <b>Physician trainees</b><br><br>Depression- 27.2%<br>Anxiety- 18.6%<br>Stress- 24.7%<br>Burnout- 40.7%                                         |

|    |                                      |                                                           |                                          |                        |      |             |                |    |                                                                                                                                                                                                                                                            |                                                                                       |
|----|--------------------------------------|-----------------------------------------------------------|------------------------------------------|------------------------|------|-------------|----------------|----|------------------------------------------------------------------------------------------------------------------------------------------------------------------------------------------------------------------------------------------------------------|---------------------------------------------------------------------------------------|
| 32 | (Keubo et al., 2020), 2020, Cameroon | 292<br>ALP-<br>AN-<br>N-<br>MD-<br>Psy-<br>MLT-<br>HT- 65 | (M+F)<br>2<br>19<br>168<br>74<br>5<br>18 | Anxiety,<br>Depression | HADS | HADS (0-21) | Prevalence (%) | NR | <b>Medical doctors (MD) Anxiety</b><br>Absent- 40.5%<br>Low- 23.0%<br>moderate- 24.3%<br>Severe- 12.2%<br><b>Depression</b><br>Absent- 33.8%<br>Low- 27.0%<br>Moderate- 24.3%<br>Severe- 12.2%<br><b>Nurses (n) Anxiety</b><br>Absent- 34.5%<br>Low- 26.3% | <b>All healthcare workers</b><br>Mild to severe anxiety- 42.20%<br>Depression- 43.50% |
|----|--------------------------------------|-----------------------------------------------------------|------------------------------------------|------------------------|------|-------------|----------------|----|------------------------------------------------------------------------------------------------------------------------------------------------------------------------------------------------------------------------------------------------------------|---------------------------------------------------------------------------------------|

|    |                                      |                                                                                               |                     |      |             |                |                                    |                                                                                                                                                         |                                                                                                                            |
|----|--------------------------------------|-----------------------------------------------------------------------------------------------|---------------------|------|-------------|----------------|------------------------------------|---------------------------------------------------------------------------------------------------------------------------------------------------------|----------------------------------------------------------------------------------------------------------------------------|
|    |                                      |                                                                                               |                     |      |             |                |                                    | <p>Moderate- 42.1%</p> <p>Severe- 15.8%</p> <p><b>Depression</b></p> <p>Absent- 22.6%</p> <p>Low- 21.1%</p> <p>Moderate- 36.8%</p> <p>Severe- 15.8%</p> |                                                                                                                            |
| 33 | (Koksal et al., 2020a), 2020, Turkey | <p><b>702 (M+F)</b></p> <p>Anesthetic technician- 363</p> <p>Operating theater nurse- 339</p> | Anxiety, depression | HADS | HADS (0-21) | prevalence (%) | <b>Total Prevalence-</b><br>49.32% | NR                                                                                                                                                      | <p><b>Nurse Depression</b></p> <p>Yes- 50.2%</p> <p>No- 47.2%</p> <p><b>Anxiety</b></p> <p>Yes- 48.8%</p> <p>No- 47.7%</p> |

|    |                                                       |                                                                                    |         |                               |                                                         |                |                                    |                                                                                |                                             |
|----|-------------------------------------------------------|------------------------------------------------------------------------------------|---------|-------------------------------|---------------------------------------------------------|----------------|------------------------------------|--------------------------------------------------------------------------------|---------------------------------------------|
| 34 | (Korkmaz et al., 2020) Turkey                         | <b>140 (M+F)</b><br>Physicians- 30<br>nurses- 70<br>Assistant healthcare staff- 40 | Anxiety | PSQI, BAI, PSI<br>WHOQOL-BREF | PSQI (0-21)<br>BAI (0-63)<br>PSI<br>WHOQOL-BREF (0-100) | Prevalence (%) | <b>Total Anxiety</b><br>Total- 33% | <b>Healthcare workers</b><br>Anxiety mild- 38%<br>moderate- 20%<br>severe- 13% | <b>Healthcare workers</b><br>Anxiety- 70.7% |
| 35 | (Labrague and De los Santos, 2020) <b>Philippines</b> | <b>325 (F)</b><br>Nurses- 325                                                      | Anxiety | BRCS, PSSQ, POS               | BRCS (4-20)                                             | Prevalence (%) | NR                                 | NR                                                                             | <b>Nurses</b><br>Anxiety- 37.8%             |

|    |                                     |                                |                     |                                                   |                          |                                                            |                |                                                                                             |                                                                                                                                                                                                                                                           |                                                                                                       |
|----|-------------------------------------|--------------------------------|---------------------|---------------------------------------------------|--------------------------|------------------------------------------------------------|----------------|---------------------------------------------------------------------------------------------|-----------------------------------------------------------------------------------------------------------------------------------------------------------------------------------------------------------------------------------------------------------|-------------------------------------------------------------------------------------------------------|
| 36 | (J. Lai et al., 2020) , 2020, China | 1257<br>Physicians-<br>Nurses- | (M+F)<br>493<br>764 | Depression,<br>anxiety,<br>insomnia,<br>distress. | PHQ-9, GAD-7, ISI, IES-R | PHQ-9 (0-27)<br>GAD-7 (0-21)<br>ISI (0-28)<br>IES-R (0-23) | Percentage (%) | <b>Healthcare workers</b><br>PHQ-9- 50.43%<br>GAD-7- 44.55%<br>ISI- 33.96%<br>IES-R- 71.51% | <b>Frontline Healthcare workers</b><br><b>PHQ-9</b><br>Normal- 41.5%<br>mild- 40.4%<br>moderate- 11.3%<br>severe- 6.7%<br><b>GAD-7</b><br>Normal- 48.4%<br>mild- 35.4%<br>moderate- 9.1%<br>severe- 6.8%<br><b>ISI</b><br>Absence- 59.3%<br>subthreshold- | <b>Frontline Healthcare workers</b><br>PHQ-9- 24.26%<br>GAD-7- 21.40%<br>ISI- 16.86%<br>IES-R- 31.66% |
|----|-------------------------------------|--------------------------------|---------------------|---------------------------------------------------|--------------------------|------------------------------------------------------------|----------------|---------------------------------------------------------------------------------------------|-----------------------------------------------------------------------------------------------------------------------------------------------------------------------------------------------------------------------------------------------------------|-------------------------------------------------------------------------------------------------------|

|    |                                        |                                                            |                     |              |                              |                |                                                                                         |                                                                                                                             |                                                                                               |
|----|----------------------------------------|------------------------------------------------------------|---------------------|--------------|------------------------------|----------------|-----------------------------------------------------------------------------------------|-----------------------------------------------------------------------------------------------------------------------------|-----------------------------------------------------------------------------------------------|
|    |                                        |                                                            |                     |              |                              |                |                                                                                         | 28.3%<br>moderate- 10.5%<br>severe- 1.7%<br><b>IES-R</b><br>Normal- 23.7<br>mild- 34.0%<br>moderate- 27.9%<br>severe- 14.1% |                                                                                               |
| 37 | (Lee et al., 2020)<br><b>Singapore</b> | <b>270 (M+F)</b><br>Antitheologist- 42.6%<br>Nurses- 57.4% | Anxiety, depression | GHQ-12, HADS | GHQ-12 (0-36)<br>HADS (0-21) | Prevalence (%) | <b>Healthcare workers</b><br>HADS-A<br><11- 69.6%<br>>11- 30.4%<br>HADS-D<br><11- 70.0% | NR                                                                                                                          | <b>Physicians</b><br>HADS-A<br><11- 31.4%<br>>11- 11.1%<br>HADS-D<br>>11- 30.7%<br><11- 11.9% |

|    |                                            |                                                                                                          |                                           |                               |                                                                 |                |            |                                                                                                                                                 |                                                                                                                                     |
|----|--------------------------------------------|----------------------------------------------------------------------------------------------------------|-------------------------------------------|-------------------------------|-----------------------------------------------------------------|----------------|------------|-------------------------------------------------------------------------------------------------------------------------------------------------|-------------------------------------------------------------------------------------------------------------------------------------|
|    |                                            |                                                                                                          |                                           |                               |                                                                 |                | >11- 30.0% |                                                                                                                                                 | <p><b>Nurse</b></p> <p>HADS-A</p> <p>&lt;11- 38.1%</p> <p>&gt;11- 19.2%</p> <p>HADS-D</p> <p>&gt;11- 39.3%</p> <p>&lt;11- 18.1%</p> |
| 38 | (Liang et al., 2020), 2020<br><b>China</b> | <p><b>899 (M+F)</b></p> <p>Medical workers- 899</p> <p>Hubei province- 138</p> <p>Other regions- 761</p> | Depression, anxiety, insomnia, resilience | PHQ-9, GAD-7, ISI, CD-RISC-10 | PHQ-9 (0-27)<br>GAD-7 (0-21)<br>ISI (0-28)<br>CD-RISC-10 (0-40) | Prevalence (%) | NR         | <p><b>Medical workers</b></p> <p>Depression</p> <p>Mild- 58.28%</p> <p>Moderate- 24.24%</p> <p>Anxiety</p> <p>Mild- 47.16%</p> <p>Moderate-</p> | <p><b>Medical workers</b></p> <p>Depression- 82.31%</p> <p>Anxiety- 61.40%</p> <p>Insomnia- 43.04%</p>                              |

|    |                                |                                                               |                           |                 |                                          |                |    |                                                                                                                                                                                            |                                                                              |
|----|--------------------------------|---------------------------------------------------------------|---------------------------|-----------------|------------------------------------------|----------------|----|--------------------------------------------------------------------------------------------------------------------------------------------------------------------------------------------|------------------------------------------------------------------------------|
|    |                                |                                                               |                           |                 |                                          |                |    | 14.23%                                                                                                                                                                                     |                                                                              |
|    |                                |                                                               |                           |                 |                                          |                |    | Insomnia                                                                                                                                                                                   |                                                                              |
|    |                                |                                                               |                           |                 |                                          |                |    | Mild- 31.81%                                                                                                                                                                               |                                                                              |
|    |                                |                                                               |                           |                 |                                          |                |    | Moderate- 11.23%                                                                                                                                                                           |                                                                              |
| 39 | (Lu et al., 2020), 2020, China | 2299(M+F)<br>Medical staff- 2042<br>Administrative staff- 257 | Fear, anxiety, depression | NRS, HAMA, HAMD | NRS (0-10)<br>HAMA (0-70)<br>HAMD (0-85) | prevalence (%) | NR | <b>Medical staff</b><br><br>Proportion of fear<br>No/mild- 29.4%<br>Moderate- 43.9%<br>Severe/extreme- 26.7%<br><br><b>proportion of anxiety</b><br><br>no- 74.5%<br>mild/ moderate- 22.6% | <b>Medical staff</b><br><br>Fear scale 62.67%<br>HAMA 22.66%<br>HAMD- 10.74% |



|    |                                                 |                                                                                                                        |                                 |             |                             |                |    |                                 |                                                                                                                           |
|----|-------------------------------------------------|------------------------------------------------------------------------------------------------------------------------|---------------------------------|-------------|-----------------------------|----------------|----|---------------------------------|---------------------------------------------------------------------------------------------------------------------------|
|    |                                                 |                                                                                                                        |                                 |             |                             |                |    | severe/ extreme-<br>2.9%        |                                                                                                                           |
|    |                                                 |                                                                                                                        |                                 |             |                             |                |    | <b>Proportion of depression</b> |                                                                                                                           |
|    |                                                 |                                                                                                                        |                                 |             |                             |                |    | No- 87.9%                       |                                                                                                                           |
|    |                                                 |                                                                                                                        |                                 |             |                             |                |    | mild/ moderate-<br>11.8%        |                                                                                                                           |
| 40 | (Luceño-Moreno et al., 2020) <b>2020, Spain</b> | <b>1422 (M+F)</b><br>Medical staff- 143<br>Nursing staff- 486<br>Assistant nurse- 443<br>Caregiver- 117<br>Others- 233 | PTSD,<br>Depression,<br>Anxiety | HADS, IES-R | HADS (0-21)<br>IES-R (0-23) | Prevalence (%) | NR | NR                              | <b>Healthcare workers</b><br>Anxiety (HADS)- 79.32%<br>Depression (HADS)- 51.33%<br>Post-traumatic stress (IES-R)- 82.98% |

|    |                                              |                                                                              |                                                     |                                        |                                                                 |                |    |    |                                                                                                 |
|----|----------------------------------------------|------------------------------------------------------------------------------|-----------------------------------------------------|----------------------------------------|-----------------------------------------------------------------|----------------|----|----|-------------------------------------------------------------------------------------------------|
| 41 | (L. Q. Wang et al., 2020) <b>2020, China</b> | <b>274 (M+F)</b><br>Doctors- 40.8%<br>Nurses- 59.2%                          | Anxiety,<br>Depression,<br>Sleep quality,<br>stress | GAD-7, PSQI,<br>PSS-14, CD-<br>RISC-10 | GAD-7 (0-21)<br>PSQI (0-21)<br>PSS-14 (0-56)<br>CD-RISC (0-100) | Prevalence (%) | NR | NR | <b>Healthcare workers</b><br><br>Anxiety- 13.9%<br><br>Depression- 16.1%<br><br>Insomnia- 19.7% |
| 42 | (Nie et al., 2020) <b>2020, China</b>        | <b>263 (M+F)</b><br>Emergency department- 196<br>non-emergency department-67 | Psychological distress                              | GHQ-12,<br>SCSQ, IES-R,<br>PSSS        |                                                                 | Prevalence (%) |    |    | <b>Frontline nurses</b><br><br><b>Psychological distress-</b> 25.4%                             |
| 43 | (Ning et al., 2020) <b>2020, China</b>       | <b>612 (M+F)</b><br>Doctors- 317                                             | anxiety,<br>depression                              | SAS, SDS                               | SAS (20-80) SDS ( $\geq 53$ )                                   | Prevalence (%) | NR | NR | <b>Nurses</b><br><br>anxiety- 20.3%<br><br>Depression-                                          |

|    |                                            |                                                                                                                                                |                     |              |             |                |    |                                                                                        |                                                                |
|----|--------------------------------------------|------------------------------------------------------------------------------------------------------------------------------------------------|---------------------|--------------|-------------|----------------|----|----------------------------------------------------------------------------------------|----------------------------------------------------------------|
|    |                                            | Nurses- 295                                                                                                                                    |                     |              |             |                |    |                                                                                        | 30.2%<br><b>Doctors</b><br>Anxiety- 12.6%<br>Depression- 20.2% |
| 44 | (Pouralizadeh et al., 2020)<br><b>Iran</b> | <b>441 (M+F)</b><br>Certified nursing assistant- 2<br>licensed practical nurse- 6<br>registered nurse- 340<br>head nurse- 49<br>supervisor- 40 | anxiety, depression | GAD-7, PHQ-9 | GAD-7 (0-4) | Prevalence (%) | NR | <b>Healthcare workers</b><br>GAD-7 no anxiety- 26.5%<br>mild- 34.7%<br>moderate- 19.7% | <b>Healthcare workers</b><br>GAD-7- 73.4%<br>PHQ-9- 90.9%      |



|    |                                |                                                                                       |                                        |                               |                                                        |                |    |                                                                                                                                                                                                                                               |                                                                                         |
|----|--------------------------------|---------------------------------------------------------------------------------------|----------------------------------------|-------------------------------|--------------------------------------------------------|----------------|----|-----------------------------------------------------------------------------------------------------------------------------------------------------------------------------------------------------------------------------------------------|-----------------------------------------------------------------------------------------|
| 45 | (Prasad et al., 2020)2020, USA | 347 (M+F)<br>Nurses- 248<br>Administrative staff-63<br>Advanced practice provider- 36 | Distress, burnout, anxiety, depression | Mini Z assessment, IES, PHQ-2 | IES-R (0-23)<br>PHQ-2 (0-6)<br>Mini Z assessment (0-5) | Prevalence (%) | NR | <b>Nurse Distress</b><br>Sub-clinical- 14.1%<br>Mild- 22.2%<br>Moderate- 38.3%<br>Severe- 25.4%<br><b>Burnout</b><br>Negative- 66.5%<br>Positive- 33.5%<br><b>Anxiety</b><br>Normal- 25.8%<br>Mild- 39.9%<br>Moderate- 21.4%<br>Severe- 12.9% | <b>Nurses</b><br>Burnout- 30%<br>Anxiety- 69.5%<br>Distress- 84.1%<br>Depression- 22.8% |
|----|--------------------------------|---------------------------------------------------------------------------------------|----------------------------------------|-------------------------------|--------------------------------------------------------|----------------|----|-----------------------------------------------------------------------------------------------------------------------------------------------------------------------------------------------------------------------------------------------|-----------------------------------------------------------------------------------------|

|    |                                    |                                                                                 |                             |                          |                              |                |                                                                                 |                                                                                                                                           |                                                                                                                                   |
|----|------------------------------------|---------------------------------------------------------------------------------|-----------------------------|--------------------------|------------------------------|----------------|---------------------------------------------------------------------------------|-------------------------------------------------------------------------------------------------------------------------------------------|-----------------------------------------------------------------------------------------------------------------------------------|
|    |                                    |                                                                                 |                             |                          |                              |                |                                                                                 | <p><b>Depression</b></p> <p>Negative- 78.2%</p> <p>Positive- 21.8%</p>                                                                    |                                                                                                                                   |
| 46 | (Q. Chen et al., 2020),2020, China | <p><b>902 (M+F)</b></p> <p>Doctors- 543</p> <p>Nurses- 311</p> <p>Others-48</p> | Anxiety, stress, depression | CMBI, TCSQ, GAD-7, PHQ-9 | GAD-7(0-21)<br>PHQ-27 (0-27) | Prevalence (%) | <p><b>Healthcare workers moderate/severe anxiety and Depression- 24.50%</b></p> | <p><b>Doctors Anxiety</b></p> <p>None- mild- 82.82%</p> <p>Moderate-severe- 17.68%</p> <p><b>depression</b></p> <p>None- mild- 81.40%</p> | <p><b>Healthcare workers</b></p> <p>Moderate-severe- 18.99%</p> <p>Anxiety- 18.99%</p> <p>Moderate-severe- depression- 16.63%</p> |

|    |                                       |                                                                                                   |                               |                   |                                      |                |                                               |                                                                                                                                                                                                         |                                                                            |
|----|---------------------------------------|---------------------------------------------------------------------------------------------------|-------------------------------|-------------------|--------------------------------------|----------------|-----------------------------------------------|---------------------------------------------------------------------------------------------------------------------------------------------------------------------------------------------------------|----------------------------------------------------------------------------|
|    |                                       |                                                                                                   |                               |                   |                                      |                |                                               | <p>Moderate-severe- 18.60%</p> <p><b>Nurse Anxiety</b></p> <p>none- mild- 85.53%</p> <p>Moderate-severe- 14.47%</p> <p><b>depression</b></p> <p>None- mild- 82.96%</p> <p>Moderate - severe- 17.04%</p> |                                                                            |
| 47 | (Que et al., 2020) <b>2020, China</b> | <b>2285 (M+F)</b><br>Medical residents- 913<br>Nurses- 208<br>physicians- 860<br>Technicians- 179 | anxiety, depression, insomnia | GAD-7, PHQ-9, ISI | GAD-7 (0-21) PHQ-9 (0-27) ISI (0-28) | Prevalence (%) | <b>Overall psychological problems- 56.58%</b> | <p><b>Healthcare workers</b></p> <p>Anxiety</p> <p>No- 53.96%</p>                                                                                                                                       | <p><b>Healthcare workers</b></p> <p>Anxiety- 46.04%</p> <p>Depression-</p> |

|  |  |                                  |  |  |  |  |  |                                                                                                                                                                                                                          |                                                                                  |
|--|--|----------------------------------|--|--|--|--|--|--------------------------------------------------------------------------------------------------------------------------------------------------------------------------------------------------------------------------|----------------------------------------------------------------------------------|
|  |  | public health practitioners- 125 |  |  |  |  |  | <p>Mild- 34.44%</p> <p>Moderate/severe- 11.60%</p> <p>Depression No- 55.62%</p> <p>Mild- 31.55%</p> <p>Moderate/severe- 12.82%</p> <p>Insomnia No- 71.25%</p> <p>Sub-threshold- 21.97%</p> <p>Moderate/severe- 6.78%</p> | <p>4437%</p> <p>Insomnia- 28.75%</p> <p>Other psychological problems- 56.59%</p> |
|--|--|----------------------------------|--|--|--|--|--|--------------------------------------------------------------------------------------------------------------------------------------------------------------------------------------------------------------------------|----------------------------------------------------------------------------------|



|    |                                   |                                                                                                           |                               |                            |                                                          |                |    |                                                               |                                                                                                                                                                                       |
|----|-----------------------------------|-----------------------------------------------------------------------------------------------------------|-------------------------------|----------------------------|----------------------------------------------------------|----------------|----|---------------------------------------------------------------|---------------------------------------------------------------------------------------------------------------------------------------------------------------------------------------|
| 48 | (R. Li et al., 2020), 2020, China | <b>176 (M+F)</b><br>Senior nurse- 120<br>Nurse-in-charge- 56                                              | Anxiety                       | HAMA                       | HAMA (0-10)                                              | Prevalence (%) |    | <b>Anxiety</b><br>mild- 27.3%<br>moderate- 25%<br>severe- 25% | <b>Frontline Nurses</b><br>Anxiety- 77.3%                                                                                                                                             |
| 49 | (Rossi et al., 2020)2020, Italy   | <b>1379 (M+F)</b><br>Nurse- 472<br>Physicians- 433<br>General practitioner- 86<br>Others- 275<br>HCA- 112 | anxiety, depression, insomnia | GPS, PHQ-9, GAD-7, ISI PSS | PHQ-9 (0-27)<br>GAD-7 (0-21)<br>ISI (0-28)<br>PSS (0-40) | Prevalence (%) | NR | NR                                                            | <b>Healthcare workers</b><br>GPS-PTSD Score $\geq 3$ - 49.38%<br>PHQ-9 Score 15- 24.73%<br>GAD-7 Score 15- 19.80%<br>ISI Score $\geq 27$ - 8.27%<br>PSS Score, first quartile- 21.90% |

|    |                                    |                                                                                                         |                                            |                          |                                                      |                |    |                                                                                                                                                                                                                               |                                                                                                        |
|----|------------------------------------|---------------------------------------------------------------------------------------------------------|--------------------------------------------|--------------------------|------------------------------------------------------|----------------|----|-------------------------------------------------------------------------------------------------------------------------------------------------------------------------------------------------------------------------------|--------------------------------------------------------------------------------------------------------|
| 50 | (\$ahin et al., 2020a)2020, Turkey | <b>620 (M+F)</b><br>Physicians- 569<br>Nurses- 254<br>Others- 105<br>Frontline- 569<br>Second line- 370 | Depression, anxiety, insomnia and distress | PHQ-9, GAD-7, ISI, IES-R | PHQ-9 (0-27)<br>GAD-7 (0-21) ISI (0-28) IES-R (0-88) | Prevalence (%) | NR | <b>Frontline Healthcare workers</b><br>PHQ-9<br>Normal- 19.7%<br>Mild- 38.5%<br>Moderate- 25.7%<br>Moderately severe- 9.5%<br>Severe- 6.7%<br>GAD-7<br>Normal- 37.6%<br>Mild- 44.1%<br>Moderate- 10.5%<br>severe- 7.7%<br>ISI | <b>Healthcare workers</b><br>Depression- 77.6%<br>Anxiety- 60.2%<br>Insomnia- 50.4%<br>Distress- 76.4% |
|----|------------------------------------|---------------------------------------------------------------------------------------------------------|--------------------------------------------|--------------------------|------------------------------------------------------|----------------|----|-------------------------------------------------------------------------------------------------------------------------------------------------------------------------------------------------------------------------------|--------------------------------------------------------------------------------------------------------|

|    |                                          |                                                  |                             |         |                |                |    |                                                                                                                                                                                               |                                                                                                                                  |
|----|------------------------------------------|--------------------------------------------------|-----------------------------|---------|----------------|----------------|----|-----------------------------------------------------------------------------------------------------------------------------------------------------------------------------------------------|----------------------------------------------------------------------------------------------------------------------------------|
|    |                                          |                                                  |                             |         |                |                |    | <p>Normal- 46.7%</p> <p>Sub- threshold- 38.5%</p> <p>Moderate- 12.7%</p> <p>Severe- 2.1%</p> <p>IES-R</p> <p>Normal- 22.1%</p> <p>Mild- 45.2%</p> <p>Moderate- 19.9%</p> <p>Severe- 12.8%</p> |                                                                                                                                  |
| 51 | (Salopek-Žiha et al., 2020)2020, Croatia | <b>124 (M+F)</b><br>Physicians- 27<br>Nurses- 97 | depression, stress, anxiety | DASS-21 | DASS-21 (0-42) | Prevalence (%) | NR | NR                                                                                                                                                                                            | <p><b>Healthcare workers</b></p> <p><b>Anxiety</b></p> <p>moderate- ver</p> <p>severe- 11%</p> <p>moderate- extremely severe</p> |

medRxiv preprint doi: <https://doi.org/10.1101/2021.11.09.21266105>; this version posted November 11, 2021. The copyright holder for this preprint (which was not certified by peer review) is the author/funder, who has granted medRxiv a license to display the preprint in perpetuity. It is made available under a CC-BY-NC-ND 4.0 International license.

|    |                                                 |                  |                             |         |                |                |    |    |                                                                                                                                                                                        |
|----|-------------------------------------------------|------------------|-----------------------------|---------|----------------|----------------|----|----|----------------------------------------------------------------------------------------------------------------------------------------------------------------------------------------|
|    |                                                 |                  |                             |         |                |                |    |    | 17%<br><b>Stress</b><br>moderate-<br>extremely severe<br>10%<br>67%<br><b>Worry</b>                                                                                                    |
| 52 | (Sandesh et al., 2020)<br><b>2020, Pakistan</b> | <b>112 (M+F)</b> | Depression, anxiety, stress | DASS-21 | DASS-21 (0-42) | Prevalence (%) | NR | NR | <b>Healthcare workers</b><br><b>Depression</b><br>Moderate/ severe<br>72.3%<br><b>Anxiety</b><br>moderate-<br>extremely severe<br>85.7% <b>stress</b><br>Moderate-<br>extremely severe |

|    |                                      |                                                                |                             |                    |                                           |                |                                               |    |                                                                                      |
|----|--------------------------------------|----------------------------------------------------------------|-----------------------------|--------------------|-------------------------------------------|----------------|-----------------------------------------------|----|--------------------------------------------------------------------------------------|
|    |                                      |                                                                |                             |                    |                                           |                |                                               |    | 90.1%                                                                                |
| 53 | (Shah et al., 2020) <b>2020, UK</b>  | <b>207 (M+F)</b><br>Consultant- 58<br>Registrar- 99<br>SHO- 50 | Anxiety, Depression         | GAD-2, PHQ-2       | PHQ-2 (0-6)<br>GAD-2 (0-21)               | Prevalence (%) | total<br>GAD-2 >3- 24.64%<br>PHQ-2 ≤2- 15.94% | NR | Consultant<br>GAD-2≤2- 69.70%<br>GAD-2≥2- 30.30%<br>PHQ-2≤ 80.81%<br>PHQ-2≥2- 19.19% |
| 54 | (Shahrour, 2020) <b>2020, Jordan</b> | <b>448 (M+F)</b><br>Nurses- 73%                                | Acute stress disorder, PTSD | SASRQ, BSI-18, GSI | BSI (0-72)<br>SASRQ (0-150)<br>GSI (0-45) | Prevalence (%) | NR                                            | NR | <b>Nurses</b><br>Acute stress disorder- 64%                                          |

|    |                                             |                                                                                                   |                                            |                       |                                                 |                |                                                                                  |    |                                                                                                                                                                                                                                                                                                                           |
|----|---------------------------------------------|---------------------------------------------------------------------------------------------------|--------------------------------------------|-----------------------|-------------------------------------------------|----------------|----------------------------------------------------------------------------------|----|---------------------------------------------------------------------------------------------------------------------------------------------------------------------------------------------------------------------------------------------------------------------------------------------------------------------------|
| 55 | (Shechter et al., 2020)<br><b>2020, NYC</b> | <b>657 (M+F)</b><br>Attending physicians- 141<br>Resident/fellow- 141<br>Nurses/AP providers- 375 | Acute stress disorder, depression, anxiety | PC-PTSD, PHQ-2, GAD-2 | PC-PTSD (0- 4)<br>PHQ-2 (0- 6)<br>GAD-2 (0- 21) | Prevalence (%) | All participants<br>Acute stress- 56.6%<br>Depression- 47.64%<br>Anxiety- 29.52% | NR | <p><b>Attending physicians</b></p> <p>Acute stress disorder- 40%<br/>Depression- 38%<br/>Anxiety- 15%</p> <p><b>Residents/fellows</b></p> <p>Acute stress disorder- 54%<br/>Depression- 44%<br/>Anxiety- 17%</p> <p><b>Nurses/ap providers</b></p> <p>Acute stress disorder- 64%<br/>Depression- 53%<br/>Anxiety- 40%</p> |
|----|---------------------------------------------|---------------------------------------------------------------------------------------------------|--------------------------------------------|-----------------------|-------------------------------------------------|----------------|----------------------------------------------------------------------------------|----|---------------------------------------------------------------------------------------------------------------------------------------------------------------------------------------------------------------------------------------------------------------------------------------------------------------------------|

|    |                                    |                                                                                                                       |                                            |                        |                                                 |                |    |    |                                                                                                                  |
|----|------------------------------------|-----------------------------------------------------------------------------------------------------------------------|--------------------------------------------|------------------------|-------------------------------------------------|----------------|----|----|------------------------------------------------------------------------------------------------------------------|
| 56 | (Si et al., 2020), 2020, China     | <b>863 (M+F)</b><br>Doctors- 377<br>Nurse- 211<br>Other HCWs- 275                                                     | PTSD,<br>Depression,<br>anxiety,<br>stress | IES-R, DASS-21         | DASS-21 (0-42)<br>IES-R (0-23)                  | Prevalence (%) | NR | NR | <b>Healthcare workers</b><br>Depression- 13.6%<br>Anxiety- 13.9%<br>Stress- 8.6%<br>Post-traumatic stress- 40.2% |
| 57 | (Skoda et al., 2020)2020., Germany | <b>2224 (M+F)</b><br>physicians- 492<br>nursing staff- 1511<br>paramedics- 221<br>non-healthcare professionals- 10639 | Anxiety,<br>Depression,<br>fear            | GAD-7, PHQ-2, EQ-5D-3L | GAD-7 (0-21)<br>PHQ-2 (0-6)<br>EQ-5D-3L (0-100) | Prevalence (%) | NR | NR | <b>Physicians</b><br>GAD-7<10- 94.10%<br>GAD-7 ≥10- 5.89%<br><b>Nurses</b><br>GAD-7 <10- 88.41%<br>GAD-7 ≥10-    |

|    |                                       |                                           |                                    |                     |                              |                |                                  |    |                                                                                                                                |
|----|---------------------------------------|-------------------------------------------|------------------------------------|---------------------|------------------------------|----------------|----------------------------------|----|--------------------------------------------------------------------------------------------------------------------------------|
|    |                                       |                                           |                                    |                     |                              |                |                                  |    | 11.38%                                                                                                                         |
| 58 | (Stojanov et al., 2020)2020, Serbia   | 201 (M+F)                                 | Anxiety, depression, sleep quality | GAD-7, SF36, PSQI   | GAD-7 (0-21) PSQI (0-21)     | Prevalence (%) | NR                               | NR | <b>Healthcare workers</b><br><b>Anxiety</b><br>GAD-7≥10- 31.8%<br><b>Depression</b><br>SDS Score 66<br>17.6%                   |
| 59 | (Suryavanshi et al., 2020)2020, India | 197 (M+F)<br>Physicians- 66<br>Nurses- 47 | Depression, anxiety                | PHQ-9, GAD-7, QoL-1 | PHQ-9 (0-27)<br>GAD-7 (0-21) | Prevalence (%) | <b>In all healthcare workers</b> | NR | <b>Physicians</b><br>Depression- 8%<br>Anxiety- 30%<br>Depression and Anxiety combined- 15%<br>Depression- 47%<br>Anxiety- 50% |



|    |                                        |                                                       |                              |                       |                                  |                |                          |    |                                                                                                                                    |
|----|----------------------------------------|-------------------------------------------------------|------------------------------|-----------------------|----------------------------------|----------------|--------------------------|----|------------------------------------------------------------------------------------------------------------------------------------|
|    |                                        |                                                       |                              |                       |                                  |                |                          |    | <p><b>Nurses</b></p> <p>Depression- 28%</p> <p>Anxiety- 25%</p> <p>Depression and Anxiety combined- 12%</p>                        |
| 60 | (Wang et al., 2020) <b>2020, China</b> | <b>123 (M+F)</b><br>Pediatric healthcare workers- 123 |                              | PSQI, SAS, SDS        | PSQI (0-21), SAS (0-4) SDS (>53) | Prevalence (%) | Sleep disturbances - 38% | NR | <p><b>Doctors</b></p> <p>PSQI &gt;7- 62%</p> <p>PSQI ≤ 7- 25%</p> <p><b>Nurses</b></p> <p>PSQI &gt;7- 38%</p> <p>PSQI ≤ 7- 75%</p> |
| 61 | (Tian et al., 2020) <b>2020, China</b> | <b>845 (M+F)</b>                                      | depression, anxiety, stress, | PSS-10, GAD-7, ISI-7, | PSS-10 (0-40)<br>GAD-7 (0-       | prevalence (%) | NR                       | NR | <p><b>Frontline healthcare workers</b></p>                                                                                         |

|    |                                             |                                                                 |                                                |              |                                 |                   |                                                                                         |                                                                                                                                                                               |                                                                                                                                     |
|----|---------------------------------------------|-----------------------------------------------------------------|------------------------------------------------|--------------|---------------------------------|-------------------|-----------------------------------------------------------------------------------------|-------------------------------------------------------------------------------------------------------------------------------------------------------------------------------|-------------------------------------------------------------------------------------------------------------------------------------|
|    |                                             |                                                                 | insomnia                                       |              | 21)<br>ISI (0-28)               |                   |                                                                                         |                                                                                                                                                                               | Depression-<br>45.6%<br>Anxiety- 20.7%<br>Insomnia- 27.0%<br>Moderate- severe<br>stress- 60.8%                                      |
| 62 | (Wasim et al.,<br>2020), 2020,<br>Pakistan. | 356 (M+F)<br>Doctors- 214<br>Nurses-78<br>Paramedics-<br>17.97% | insomnia,<br>depression,<br>anxiety,<br>stress | ISI, DASS-21 | ISI (0-28)<br>DASS-21<br>(0-42) | Prevalence<br>(%) | Depression-<br>62.35%<br>anxiety-<br>63.33%<br>insomnia-<br>53.37%<br>stress-<br>55.33% | <b>Healthcare<br/>workers</b><br><b>Insomnia</b><br><b>Depression</b><br>none/min- 8.42%<br>mild- 76.9%<br>moderate-<br>13.15%<br>severe- 1.6%<br><b>Anxiety</b><br>None/min- | <b>DOCTORS</b><br>Insomnia-<br>50.52%<br>non- insomnia-<br>71.1%<br><b>NURSES</b><br>Insomnia-<br>24.21%<br>non- insomnia-<br>19.3% |

|    |                                               |                                                                  |                               |                   |                                      |                |    |                  |                                                                            |
|----|-----------------------------------------------|------------------------------------------------------------------|-------------------------------|-------------------|--------------------------------------|----------------|----|------------------|----------------------------------------------------------------------------|
|    |                                               |                                                                  |                               |                   |                                      |                |    | 16.9%            |                                                                            |
|    |                                               |                                                                  |                               |                   |                                      |                |    | Mild- 63.15%     |                                                                            |
|    |                                               |                                                                  |                               |                   |                                      |                |    | Moderate- 14.21% |                                                                            |
|    |                                               |                                                                  |                               |                   |                                      |                |    | Severe- 5.8%     |                                                                            |
|    |                                               |                                                                  |                               |                   |                                      |                |    | <b>Stress</b>    |                                                                            |
|    |                                               |                                                                  |                               |                   |                                      |                |    | None/min- 15.8%  |                                                                            |
|    |                                               |                                                                  |                               |                   |                                      |                |    | Mild- 54.78%     |                                                                            |
|    |                                               |                                                                  |                               |                   |                                      |                |    | Moderate- 26.9%  |                                                                            |
|    |                                               |                                                                  |                               |                   |                                      |                |    | Severe- 2.63%    |                                                                            |
| 63 | (Wańkiewicz et al., 2020) <b>2020, Poland</b> | <b>441 (M+F)</b><br>Frontline HCWs- 206<br>Second-line HCWs- 135 | Anxiety, depression, insomnia | GAD-7, PHQ-9, ISI | GAD-7 (0-27) PHQ-9 (0-21) ISI (0-28) | Prevalence (%) | NR | NR               | <b>Frontline Healthcare workers</b><br>GAD-7<br>GAD-7≤4- 0.97%<br>GAD-7 ≥5 |

medRxiv preprint doi: <https://doi.org/10.1101/2021.11.09.21266105>; this version posted November 11, 2021. The copyright holder for this preprint (which was not certified by peer review) is the author/funder, who has granted medRxiv a license to display the preprint in perpetuity. It is made available under a CC-BY-NC-ND 4.0 International license.

|    |                                    |                                        |                             |                      |                                             |                |    |                                                                                                              |                                                                                                    |
|----|------------------------------------|----------------------------------------|-----------------------------|----------------------|---------------------------------------------|----------------|----|--------------------------------------------------------------------------------------------------------------|----------------------------------------------------------------------------------------------------|
|    |                                    |                                        |                             |                      |                                             |                |    |                                                                                                              | 99.03%<br>PHQ-9<br>PHQ-9 ≤4- 0.49%<br>PHQ-9 >4- 99.51%<br>ISI<br>ISI ≤8- .00%<br>ISI >8- 100.00%   |
| 64 | (Wilson et al., 2020), 2020, India | 350 (M+F)<br>Doctor- 295<br>Nurses- 55 | Stress, depression, anxiety | GAD-7, PHQ-9, PSS-10 | GAD (0-21)<br>PHQ-9 (0-21)<br>PSS-10 (0-47) | Prevalence (%) | NR | Healthcare workers<br>STRESS<br>Low- 17.4%<br>moderate- 78.9%<br>high- 3.7%<br>DEPRESSION<br>none-min- 50.6% | Healthcare workers<br>Perceived stress- 82.57%<br>Depressive symptoms- 49.42%<br>Anxiety symptoms- |

|    |                                    |           |                   |       |              |                |  |                                                                                                                                                                  |                                                                                                   |
|----|------------------------------------|-----------|-------------------|-------|--------------|----------------|--|------------------------------------------------------------------------------------------------------------------------------------------------------------------|---------------------------------------------------------------------------------------------------|
|    |                                    |           |                   |       |              |                |  | mild- 38.0%<br>moderate- 8.6%<br>moderately<br>severe- 2.0 %<br>severe- 0.8%<br>ANXIETY<br>none- min-<br>33.7%<br>mild- 48.6%<br>moderate- 13.7%<br>severe- 4.0% | 66.28%                                                                                            |
| 65 | (X. Chen et al., 2020) 2020, China | 252 (M+F) | Distress, anxiety | GAD-7 | GAD-7 (0-21) | Prevalence (%) |  |                                                                                                                                                                  | <b>Healthcare workers</b><br><b>Psychological</b><br>Distress- 32.5%<br>Anxiety disorder<br>28.2% |

|    |                                  |                                                                                                                                                                   |                             |            |                       |                |                                                                                                     |    |                                                                                                                                                      |
|----|----------------------------------|-------------------------------------------------------------------------------------------------------------------------------------------------------------------|-----------------------------|------------|-----------------------|----------------|-----------------------------------------------------------------------------------------------------|----|------------------------------------------------------------------------------------------------------------------------------------------------------|
| 66 | (Xiao et al., 2020), 2020, China | <p><b>958 (F+M)</b></p> <p>Clinical physician- 378</p> <p>Nurse- 359</p> <p>Working in CT room- 323</p> <p>Work in clinical laboratory- 87</p> <p>Others- 102</p> | Stress, anxiety, depression | PSS-14 HAD | PSS (0-56) HAD (0-21) | Prevalence (%) | <p><b>Total anxiety and depression</b></p> <p>Clinical physicians- 40.70%</p> <p>Nurses- 45.30%</p> | NR | <p><b>Clinical physicians</b></p> <p>Anxiety- 45.5%</p> <p>Depression- 53.7%</p> <p><b>Nurses</b></p> <p>Anxiety- 50.5%</p> <p>Depression- 62.4%</p> |
|----|----------------------------------|-------------------------------------------------------------------------------------------------------------------------------------------------------------------|-----------------------------|------------|-----------------------|----------------|-----------------------------------------------------------------------------------------------------|----|------------------------------------------------------------------------------------------------------------------------------------------------------|

medRxiv preprint doi: <https://doi.org/10.1101/2021.11.09.21266105>; this version posted November 11, 2021. The copyright holder for this preprint (which was not certified by peer review) is the author/funder, who has granted medRxiv a license to display the preprint in perpetuity. It is made available under a [CC-BY-NC-ND 4.0 International license](https://creativecommons.org/licenses/by-nc-nd/4.0/).

|    |                                         |                                                 |                              |                                                |                           |                                               |                |    |                                                                                                                                                                                                                                                                                |                                                                                                                    |
|----|-----------------------------------------|-------------------------------------------------|------------------------------|------------------------------------------------|---------------------------|-----------------------------------------------|----------------|----|--------------------------------------------------------------------------------------------------------------------------------------------------------------------------------------------------------------------------------------------------------------------------------|--------------------------------------------------------------------------------------------------------------------|
| 67 | (Xiaoming et al., 2020)<br><b>China</b> | <b>8817</b><br>Doctor-<br>Nurse-<br>Others- 920 | <b>(M+F)</b><br>3212<br>4685 | Depression,<br>anxiety,<br>somatic<br>symptoms | PHQ-9, GAD-7, PHQ-15, SSI | GAD-7 (0-21)<br>PHQ-9 (0-27)<br>PHQ-15 (0-30) | Prevalence (%) | NR | <p><b>PHQ-9</b></p> <p>No symptoms- 69.8%</p> <p>min- 20.8%</p> <p>mild- 6.2%</p> <p>moderate- 2.1%</p> <p>severe- 1.1%</p> <p><b>GAD-7</b></p> <p>no symptom- 79.3%</p> <p>Low- 15.6%</p> <p>medium- 3.2%</p> <p>high- 1.9%</p> <p><b>PHQ-15</b></p> <p>no symptom- 53.8%</p> | <p><b>Healthcare workers</b></p> <p>PHQ-9- 30.23%</p> <p>GAD-7- 20.68%</p> <p>PHQ-15- 46.18%</p> <p>SSI- 6.53%</p> |
|----|-----------------------------------------|-------------------------------------------------|------------------------------|------------------------------------------------|---------------------------|-----------------------------------------------|----------------|----|--------------------------------------------------------------------------------------------------------------------------------------------------------------------------------------------------------------------------------------------------------------------------------|--------------------------------------------------------------------------------------------------------------------|

|    |                                  |                                          |                                                                      |        |               |                |                                 |                                                                                              |                                                                   |
|----|----------------------------------|------------------------------------------|----------------------------------------------------------------------|--------|---------------|----------------|---------------------------------|----------------------------------------------------------------------------------------------|-------------------------------------------------------------------|
|    |                                  |                                          |                                                                      |        |               |                |                                 | Low- 26.4%<br>medium- 13.7%<br>high- 6.1%<br><b>SSI</b><br>no symptom-<br>93.5%<br>Low- 6.5% |                                                                   |
| 68 | (Xing et al., 2020), 2020, China | 548 (M+F)                                | Somatization, Obsessive compulsive disorder, anxiety, phobic anxiety | SCL-90 | SCL-90 (0-90) | Prevalence (%) | NR                              | NR                                                                                           | <b>Doctors and nurses</b><br>Depression- 29.74%<br>Anxiety- 34.2% |
| 69 | (Yang et al., 2020a)2020, China  | 449 (M+F)<br>Doctors= 285<br>Nurses= 164 | Anxiety otolarygology healthcare                                     | SAS    | SAS (20-75)   | Prevalence (%) | <b>Total anxiety-</b><br>29.18% | NR                                                                                           | <b>Doctors Anxiety</b><br>Yes- 25.26%                             |



|    |                                         |                                                                                                                        |                   |            |                            |                |    |    |                                                                      |
|----|-----------------------------------------|------------------------------------------------------------------------------------------------------------------------|-------------------|------------|----------------------------|----------------|----|----|----------------------------------------------------------------------|
|    |                                         |                                                                                                                        | workers           |            |                            |                |    |    | No- 74.74%<br><b>Nurse</b><br>Yes- 35.98%<br>No- 64.02%              |
| 70 | (Yáñez et al., 2020), <b>2020, Peru</b> | <b>303 (M+F)</b><br>Physicians- 53<br>Nurses- 63<br>Pharmacists- 63<br>technicians- 80<br>volunteers- 20<br>others- 24 | Anxiety, distress | GAD-7, K-6 | GAD-7 (0-21)<br>K-6 (6-30) | Prevalence (%) | NR | NR | <b>Healthcare workers</b><br>Anxiety- 2.7%<br>Mental distress- 26.1% |

|    |                                     |                                                  |                             |         |                |                |                                                                                   |                                                                                                                                                                                                                                                                      |                                                                                                                                                 |
|----|-------------------------------------|--------------------------------------------------|-----------------------------|---------|----------------|----------------|-----------------------------------------------------------------------------------|----------------------------------------------------------------------------------------------------------------------------------------------------------------------------------------------------------------------------------------------------------------------|-------------------------------------------------------------------------------------------------------------------------------------------------|
| 71 | (Y. Liu et al., 2020b), 2020, China | 2031 (M+F)<br>Pediatric healthcare workers- 2031 | Anxiety, depression, stress | DASS-21 | DASS-21 (0-42) | Prevalence (%) | All healthcare workers<br>depression- 14.81%,<br>stress- 9.98%,<br>anxiety- 18.3% | <b>Doctors</b><br><b>Depression</b><br>Mild- 8.86%<br>Moderate- 6.42%<br>Severe- 0.93%<br>Extremely severe- 0.82%<br><b>Anxiety</b><br>Mild- 7.93%<br>Moderate- 7.93%<br>Severe- 8.97%<br>extremely severe- 1.17%<br><b>Stress</b><br>mild- 5.71%<br>Moderate- 4.66% | <b>Doctors</b><br>Depression- 7.18%<br>Anxiety- 8.21%<br>Stress- 5.02%<br><b>Nurses</b><br>Depression- 7.63%<br>Anxiety- 10.7%<br>Stress- 4.97% |
|----|-------------------------------------|--------------------------------------------------|-----------------------------|---------|----------------|----------------|-----------------------------------------------------------------------------------|----------------------------------------------------------------------------------------------------------------------------------------------------------------------------------------------------------------------------------------------------------------------|-------------------------------------------------------------------------------------------------------------------------------------------------|

medRxiv preprint doi: <https://doi.org/10.1101/2021.11.09.21266105>; this version posted November 11, 2021. The copyright holder for this preprint (which was not certified by peer review) is the author/funder, who has granted medRxiv a license to display the preprint in perpetuity. It is made available under a [CC-BY-NC-ND 4.0 International license](https://creativecommons.org/licenses/by-nc-nd/4.0/).

|    |                                 |                                                       |                                     |                     |                             |                |    |                                          |                                                                                                                                          |
|----|---------------------------------|-------------------------------------------------------|-------------------------------------|---------------------|-----------------------------|----------------|----|------------------------------------------|------------------------------------------------------------------------------------------------------------------------------------------|
|    |                                 |                                                       |                                     |                     |                             |                |    | Severe- 0.93%<br>Extremely severe- 0.58% |                                                                                                                                          |
| 72 | (Yin et al., 2020), 2020, China | 377 (M+F)<br>Doctors- 67<br>Nurses- 264<br>others- 40 | PTSS post-traumatic stress symptoms | DSM-5 (PCL-5), PSQI | PCL-5 (0-80)<br>PSQI (0-21) | Prevalence (%) | NR | NR                                       | Healthcare workers,<br>PCL-5- 3.8%<br>Very bad sleep satisfaction- 7%<br>Frequent sleep disturbances- 11.3%<br>Difficulty falling asleep |

medRxiv preprint doi: <https://doi.org/10.1101/2021.11.09.21266105>; this version posted November 11, 2021. The copyright holder for this preprint (which was not certified by peer review) is the author/funder, who has granted medRxiv a license to display the preprint in perpetuity. It is made available under a [CC-BY-NC-ND 4.0 International license](https://creativecommons.org/licenses/by-nc-nd/4.0/).

|    |                                      |                            |                           |                     |                                              |                |                                                                                                                  |    |                                                                                                                    |
|----|--------------------------------------|----------------------------|---------------------------|---------------------|----------------------------------------------|----------------|------------------------------------------------------------------------------------------------------------------|----|--------------------------------------------------------------------------------------------------------------------|
|    |                                      |                            |                           |                     |                                              |                |                                                                                                                  |    | 6.7%                                                                                                               |
|    |                                      |                            |                           |                     |                                              |                |                                                                                                                  |    | Had less than 6hrs of sleeping time- 6.2%                                                                          |
| 73 | (Zhan et al., 2020), 2020, China     | 1794 (M+F)                 | Insomnia                  | AIS, FS-14, CPSS    | AIS (1-75)<br>FS-14 (0-63)<br>CPSS (0-80)    | Prevalence (%) | NR                                                                                                               | NR | <b>Nurses</b><br>Insomnia- 52.8%                                                                                   |
| 74 | (Y. Wang et al., 2020a), 2020, China | 1897 (M+F)<br>Doctors- 563 | Depression, Anxiety, PTSD | PHQ-9, GAD-7, IES-R | PHQ-9 (0-27)<br>GAD-7 (0-21)<br>IES-R (0-28) | Prevalence (%) | <b>Healthcare workers</b><br>Depression<br>Yes- 15.0%<br>No- 85.0%<br>Anxiety<br>Yes- 27.1%<br>No- 72.9%<br>PTSD | NR | <b>Frontline healthcare workers</b><br>Depression<br>Yes- 28.7%<br>No- 78.3%<br>Anxiety<br>Yes- 38.5%<br>No- 61.5% |

|    |                                          |                                                                                          |                                                                                                                |                                    |                                        |                |                                                                                                                 |    |                                                                                                                                         |
|----|------------------------------------------|------------------------------------------------------------------------------------------|----------------------------------------------------------------------------------------------------------------|------------------------------------|----------------------------------------|----------------|-----------------------------------------------------------------------------------------------------------------|----|-----------------------------------------------------------------------------------------------------------------------------------------|
|    |                                          |                                                                                          |                                                                                                                |                                    |                                        |                | Yes- 9.8%<br>No- 90.2%<br>Yes- 15.0%                                                                            |    | PTSD<br>Yes- 15.4%                                                                                                                      |
| 75 | (Yifang Zhou et al., 2020)China          | <b>1931 (M+F)</b>                                                                        | Poor sleep quality                                                                                             | PSQI                               | PSQI (0-21)                            | Prevalence (%) | NR                                                                                                              | NR | <b>Frontline Healthcare workers</b><br><b>Poor sleep quality-</b> 18.4%                                                                 |
| 76 | (W. R. Zhang et al., 2020), <b>China</b> | <b>2182 (M+F)</b><br>Medical healthcare workers- 927<br>Non-medical health workers- 1255 | Insomnia, anxious and depressive symptoms, somatic symptoms, obsessive-compulsive symptoms and phobic anxiety. | ISI, SCL-90-R, PHQ-4, PHQ-2, GAD-2 | PHQ-9 (0-27) GAD-7 (0-21) IES-R (0-28) | Prevalence (%) | Medical HW + non-medical HW<br>Insomnia- 33.9%<br>Anxiety- 10.4%<br>Depression- 10.6%<br>Somatization symptoms- | NR | <b>Medical Healthcare workers</b><br>Insomnia- 38.4%<br>Anxiety- 13.0%<br>Depression- 12.2%<br>Somatization symptoms- 1.6%<br>Obsessive |

|    |                                          |                                                                           |                                   |                         |                                                   |                   |                                                                                             |          |                                                                                                                                                                        |
|----|------------------------------------------|---------------------------------------------------------------------------|-----------------------------------|-------------------------|---------------------------------------------------|-------------------|---------------------------------------------------------------------------------------------|----------|------------------------------------------------------------------------------------------------------------------------------------------------------------------------|
|    |                                          |                                                                           |                                   |                         |                                                   |                   | 0.9%<br>Obsessive<br>compulsive<br>symptoms-<br>3.5% Phobic<br>anxiety- 2.9%                |          | compulsive<br>symptoms- 5.3%<br>Phobic anxiety<br>3.6%                                                                                                                 |
| 77 | (Z. Zhu et al.,<br>2020a),2020,<br>China | <b>5062 (M+F)</b><br>Physicians- 1004<br>Nurses- 3417<br>Technicians- 641 | Stress,<br>depression,<br>anxiety | PHQ-9, GAD-<br>7, IES-R | PHQ-9 (0-<br>27) GAD-7<br>(0-21) IES-<br>R (0-28) | Prevalence<br>(%) | <b>Healthcare<br/>workers</b><br>Stress- 29.8%<br>Depression-<br>13.5%<br>Anxiety-<br>24.1% | NR<br>NR | <b>Doctors</b><br>Depression-<br>16.7%<br>Anxiety- 19.1%<br>Psychological<br>stress- 16.1%<br><b>Nurses</b><br>Depression-<br>71.8%<br>Anxiety- 70.9%<br>Psychological |

|    |                                     |                                                                 |                                                       |                           |                                                             |                |    |    |                                                                                                                                        |
|----|-------------------------------------|-----------------------------------------------------------------|-------------------------------------------------------|---------------------------|-------------------------------------------------------------|----------------|----|----|----------------------------------------------------------------------------------------------------------------------------------------|
|    |                                     |                                                                 |                                                       |                           |                                                             |                |    |    | stress- 74.9%                                                                                                                          |
| 78 | (Zhou et al., 2020)<br><b>China</b> | <b>1705 (M+F)</b><br>Frontline- 606<br>General population- 1099 | Depression, anxiety, somatization, insomnia, suicide. | PHQ-9, GAD-7, SCL-90, ISI | PHQ-9(0-27)<br>GAD-7 (0-21)<br>SCL-90 (12-60)<br>ISI (0-28) | Prevalence (%) | NR | NR | <b>Frontline staff</b><br>Depressive symptoms- 56%<br>Anxiety symptoms- 44%<br>Somatic symptoms- 10%<br>Insomnia- 32%<br>Suicide 13.0% |

COVID-19- Coronavirus disease 2019, SARS-CoV-19- severe acute respiratory syndrome coronavirus 2, MERS- Middle East Respiratory syndrome ,HCWs- Healthcare workers , FL- Frontline , GAD-7- Generalized anxiety disorder assessment scale, PHQ-9- patient health questionnaire, HADS- Hospital anxiety depression scale , ISI- 7- Insomnia severity index, PLC-5- post traumatic stress disorder checklist, IES-R- Impact event scale revised , PHQ-5- Patient health questionnaire , Y-BOCS- Yale brown obsessive compulsive scale , ESS- Epworth

sleepiness scale , HADS- Hospital anxiety depression scale , BDI- IA- Beck Depression Inventory , PSQI- Pittsburgh sleep quality index, HARS- Hamilton Anxiety rating scale , NASA- TLX- NASA task load index , STAI-Y1- State- Trait Anxiety Inventory (STAI), BDI-II- Beck depression inventory- II, DASS-21- Depression, anxiety and stress scale-21 items , PSS-14- The Perceived stress scale 14- item , PSS-10- The perceived stress scale 10-items , BAI- Beck anxiety inventory, PDEQ- Peritraumatic dissociative Experience questionnaire , PSI WHOQL-BREF- World Health organization quality of life instrument , GHQ-12- General Health questionnaire 12- item scale , PHQ-2- Patient health questionnaire 2- item scale , GSI- Global severity index scale 53 item , GAD-2- Generalized anxiety disorder 2- item scale , Pro QoL- Professional Quality of life scale , SAS- Self- rating anxiety scale , CES-D- Centre for epidemiologic studies depression scale , AIS- Abbreviated injury scale , DBAS-16- Dysfunctional beliefs and attitudes about sleep scale, 16 item self-reported scale, CAS-I- Cognitive attention syndrome , PFI- Professional fulfillment index scale, BRCS- Brief Cognitive Rating Scale , PSSQ- Perceived social support questionnaire, POS- The palliative outcome scale , CD-RISC-10- Connor-Davidson Resilience Scale (CD-RISC),, NRS- Numeric rating scale , HAMA- Hamilton Anxiety Rating scale , HAMD- Hamilton Rating scale for depression , TCSQ- Tayside Childre's Sleep Questionnaire , CMBI- Chinese Maslach Burnout Inventory , SASRQ- Stanford Acute Stress Reaction Questionnaire , BSI- 18- Brief symptom Inventory 18 , PC-PTSD- Primary care- Post Traumatic stress disorder , EQ-5D-3L- Health status assessment questionnaire of the patient, SF36- 36 item short form survey, SDS- Self- Rating Depression scale, SCL-90- The symptom Checklist- 90-R, K-6- Kessler 6 scale , DSM-5- The diagnostic and statistical Manual of Mental disorders, fifth Edition , FS-14- The Chadler fatigue scale , CPSS- Child PTSD symptom scale, ED- Emergency department, ALP- Assistant laboratory personnel, AN- Assistant nurse, N- nurse, MD- Medical doctor, Psy- Clinical, psychologist, MLT- Medical laboratory technician, HT- Health technicians

### **3.5 Insomnia**

Eighteen cross-sectional studies estimated the prevalence of insomnia and poor sleep quality among the FHW (**Table 2**). Various studies reported prevalence of insomnia among 32-57% FHWs (Herrero San martin et al., 2020; Zhou et al; Zhang et al, 2020; Janato iddrissi et al, 2020). Another study showed that 6.2% HCW had less than 6 hours of sleep, 11.3% frequently had sleep disturbances, 2.7% had very bad sleep satisfaction, and 6.7% had difficulty in falling asleep (Yin et al., 2020). One study disclosed that 50.4% HCW had insomnia, out of which 2.1% had severe insomnia, 38.5% had sub-threshold and 9.55% had moderately severe insomnia (Sahin et al., 2020). About 8.27% HCW had ISI score  $\geq 22$ , showing sleeplessness (Rossi Rodolfo et al., 2020). A similar study showed prevalence of 43.04% of insomnia in FHW, out of which 11.2% had moderate insomnia and 31.81% had



mild symptoms of insomnia (Liang et al., 2020). Insomnia severity index of 11% nurses and 11.4% doctors came out to be more than 14 i.e.  $ISI > 14$ . (Bhargava et al., 2020) and (Cheng et al., 2020) evaluated the prevalence of 30% poor sleep quality and insomnia in HCW. Another study showed that nurses (60.97%) had more insomnia than doctors (39.02%) (S.Wang et al., 2020). Another study reported that 1.6% HCW suffering from insomnia had severe depression, 5.8% had severe anxiety and 2.63% suffered from severe stress. Contrary to other studies this showed that doctors (50.52%) had more insomnia than nurses (24.21%) (Wasim et al., 2020) (**Table 2**).

### 3.6 Stress

Twenty studies assessed the stress level of FHW. Various studies reported the prevalence of stress among HCW in range of 60.8%-90.1% (Zhu et al., 2020; Luseno moreno et al, 2020; (Sandesh et al., 2020). Another study demonstrated that 82.57% of HCW had stress, out of which 3.7% had high stress levels and 78.9% had moderate stress (Wilson et al., 2020). Luseno moreno et al, 2020 revealed that 82.98% HCW were dealing with PTSD whereas Wang et al., 2020 reported only 15.4% FHW had PTSD. From one study it was disclosed that high stress levels were indicated in nurses (81.5%) than doctors (11.5%) (Li et al, 2020). Other studies also showed prevalence of stress and PTSD among HCW in the range of 21.7%-28.9% (Almater et al., 2020; Alshekaili et al., 2020a; Fauzi et al., 2020; Johnson et al., 2020; Kannampallil et al., 2020; Wang et al., 2020) (**Table 2**).

### 3.7 Distress

Seven studies evaluated the prevalence of distress among HCW. Chen et al, 2020 estimated that besides anxiety disorders suffered by frontline workers which came out to be 32.5%, 28.2% participants had psychological distress. Another study analyzed that physicians (62.0%) suffered more distress than residents (58.2%) (Civantos et al., 2020). **Lai et al., 2020** examined distress using IES-R scoring tool and reported that 31.66% FHW were in distress

along with 24.26% depression and 21.40% anxiety. Prasad et al., 2020 highlighted that 84.1% nurses tolerated distress during pandemic whereas Nie et al., 2020 reported prevalence rate of 25.1% of distress among nurses. In a similar article, 76.4% distress prevalence was observed in HCW (Şahin et al., 2020a). Yanez et al., 2020 used K-6 scoring tool and found that HCW suffered more with distress (26.1%) than anxiety (2.7%) (Table-2).

### **3.8 Other psychological symptoms**

(Antonijevic et al., 2020b) evaluated resilience in HCW to be 10.33% whereas somatization, peritraumatic dissociation estimations were assessed by (Azoulay et al., n.d.) (Bhargava et al., 2020). Burnout (Civantos et al., 2020), suicidal ideation, (Hong et al., 2020)(Azoulay et al., n.d.), somatization and obsessive-compulsive disorder in FHW was assessed by various studies (H. Cai et al., 2020; Juan et al., 2020; B. Zhou et al., 2020)(Xiaoming et al., 2020). Zhang et al., 2020 in his study showed the phobic anxiety encountered by medical healthcare workers (Table 2).

## **4. DISCUSSION**

Healthcare workers has acknowledged the outspread of COVID-19 conscientiously (Wasim et al., 2020). Medical staff during the course of pandemic went through exorbitant levels of anxiety, depression, insomnia , somatization and obsessive compulsive disorders and were also prone to grow high grade mental disorders (W. R. Zhang et al., 2020). Thus, in the context of the COVID-19 pandemic, this timely review is both relevant and urgent.

HCWs are presented with unique set of challenges and stressors which include uncertainties such as duration, lack of adequate PPE, gowns, respiratory mask, and face shields, magnitude of crisis, unpreparedness, health threats, transmission risk to loved ones and colleagues (Albott et al., 2020; Anmella et al., 2020; Hall, 2020; Shaukat et al., 2020; Walton et al., 2020). Family safety is the major concerns thus limiting their physical contact with family members to minimize the risk of viral transmission (Albott et al., 2020; Hall, 2020; Jun et al.,

2020; Walton et al., 2020). Difficulty in falling asleep, lethargy, irritability generalized anxiety, dejection and feeling submerged because of daily demands served as factors for inconvenience (W. R. Zhang et al., 2020). Also, continuous influx of challenges in treating patients leads to mental exertion, boredom and decreased interest (Walton et al., 2020).

The reasons for their mental health disturbance are due to ambiguity in job role and poor shifts management, leading to lessened efficiency and burnout (Selamu et al., 2017)(Anmella et al., 2020)(AlAteeq et al., 2020). There is need to monitor these psychological morbidities on regular basis.

One study showed that, anxiety and depression levels among medical staff were higher than the national norms (Cheng et al., 2020). Unmarried or single FHWs, due to lower professional enervation and household liability, indicated surege in mental health problem (Z. Zhu et al., 2020c). According to a survey, anxiety levels showed the drift from first increasing then decreasing and was associated with the age, profession and education. Constant distress, worry, irritability, disturbed concentration, work alteration, difficulties in interpersonal relationships, somatization and depression, imposed uncertainty, and burdened HCW ((Albott et al., 2020)(Elhadi et al., 2020a).

Levels of depression and anxiety were also seen among the ICU professionals. A clinical study showed that female nurses were found to be more anxious than doctors. Also, young age appeared to be the risk factors for anxiety and depression (Caillet et al., 2020a). In other studies, incidences of anxiety levels were less among the trained staff working in close proximity with COVID patients. The psychological end results of the pandemic should make us question about the individualized care to HCWs (Caillet et al., 2020b)(Buselli et al., n.d.)2020; (Gallopini et al., 2020); (Elhadi et al., 2020a).

Also, FHWs had reduced confidence than non-FHW in handling virus. Experiences HCW had less mental health issues as compared to interns (M. Zhang et al., 2020) Good training

and relevant knowledge of the disease can effectively lessens the expanse of anxiety, consternation and precariousness (Yifang Zhou et al., 2020). Less educated workers were more likely to get insomnia (Wasim et al., 2020). A survey of 534 pediatric medical staff estimated that outpatient emergency departments and those having bachelor's degree had high anxiety (Cheng et al., 2020).

Results from the studies conducted in China and other pandemics in the past indicated that FHW had higher distress levels in pandemic (J. Lai et al., 2020); (Prasad et al., 2020). Clinical PTSD symptoms were developed in those who had sub-clinical symptoms due to work setting and continuous challenges and traumatic occurrences, thus there is a need to monitor the sub-clinical symptoms among the persons treating COVID-19 patients (Johnson et al., 2020)(Caillet et al., 2020a). High level of stress lead to burnout which accentuate the exploration of interdependence between burnout, stress and PTSD (Johnson et al., 2020). Supplications have been made in several papers that mental aids should be called for HCWs and particular measures should be taken on psychiatric illness so as to reduce PTSD (Johnson et al., 2020). Women were seen more vulnerable in developing PTSD and required adequate social support by partners (Di Tella et al., 2020). Clinical study showed that, the prevalence of psychological distress among FHW was more than in general population in China (Nie et al., 2020).

In another study it was also reported that people were afraid to meet the nurses and doctors as they feared that they might carry virus with them and can transmit disease to them. FHWs also had to handle the stigmatization from the public which lead to psychological stress eventually (Yifang Zhou et al., 2020). Another considerable apprehension was mistreatment and abuse (either physical or verbal). About 52.3% physicians disclosed minimum one episode of certain kind of abuse. About 31% of the physicians experienced stigmatization by patients (Elhadi et al., 2020a).

Sleep disturbances among HCWs are individualistically associated with depression. About, 38% HCWs suffered from sleep disturbances (Wang et al., 2020). In accordance with a cross-sectional survey, conducted in China among HCW who were directly involved with COVID-19 infected patients, 50.4% suffered from depression, 44.6% from anxiety, 34% from insomnia and 71% from distress (Wańkiewicz et al., 2020). The collaborative pervasiveness of sleep disturbances according to a recent systematic review and meta-analysis established that prevalence of sleep disorders among Chinese FHWs was found to be 39.2%. US doctors working in emergency departments had 31% of poor sleep quality and among Pakistani physicians it was 36.8% (Qiu et al., 2020)(Yifang Zhou et al., 2020).

Belief in conspiracy theory in regard to COVID-19 origin were considered to be related to the weak mental health (X. Chen et al., 2020). Service factors which include lack of quality training being given to HCW in providing mental healthcare in isolation units in hospitals, as in this situational setting of pandemic when transmission rates are high and people are dying, there are common mental health problems which are being faced by both patients and care providers. Lack of organizational support is also the major reason for lack of confidence and burnout and psychological morbidities. Inexperienced doctors with inadequate training, unqualified hand washing and improper knowledge of infection control are the factors responsible for the increment of psychological disturbances among medical staff contributing to the development of risks in their life (Xiang et al., 2020);(Kisely et al., 2020); Shaukat et al., 2020; (Albott et al., 2020); (Jun et al., 2020); (Y. Wang et al., 2020b)(Keubo et al., 2020); (Krishnamoorthy et al., 2020).

## **5. CONCLUSION**

Medical staff has suffered from high degrees of mental disturbances due to miscellaneous inducements. Governing the robustness among FHW during this time of universal calamity caused due to outbreak of SARS-CoV-2 is very crucial. Many avoidable particulars can be

contemplated as the components which are being used to control the current situation of the widespread are burdensome to recast. The prevailing phobia, can be cut down by the proper propagation of knowledge, information and resources of the current situation. Stigma, intolerance and prejudices can be subjugated by educating the healthcare workers, their families and general population. Health policy makers must weigh up the seriousness of the preventive approaches to attenuate the psychological manifestations. HCWs need to be emancipated and their roles and efforts are needed to be acknowledged. Psychological support and potent course of action should be available promptly at multifarious modalities as they play a condemnatory part at odds with COVID-19.

### **Acknowledgements**

None.

### **Declaration of competing interest**

The authors have no relevant affiliation or financial involvement with any organization or entity with a financial interest in or financial conflict with the subject matter or materials discussed in the manuscript. This includes employment, consultancies, honoraria, stock ownerships or options, expert testimony, grants or patents received or pending, or royalties.

### **Contributors**

**Rhythm Joshi:** Conceptualization, Methodology, Data Curation, Writing-Original Draft, Visualization. **Nidhi.B.Agarwal:** Validation, Writing-Review and Editing. **Dinesh Bhurani:** Writing-Review and Editing. **Mohd Ashif Khan:** Conceptualization, Methodology, Data Curation, Writing-Original Draft, Writing-Review and Editing, Visualization, Validation

### **Funding**

This research received no grants from any funding agency- commercial, public or non- profit sectors.

## References

- AlAteeq, D.A., Aljhani, S., Althiyabi, I., Majzoub, S., 2020. Mental health among healthcare providers during coronavirus disease (COVID-19) outbreak in Saudi Arabia. *J. Infect. Public Health* 13, 1432–1437. <https://doi.org/10.1016/j.jiph.2020.08.013>
- Albott, C.S., Wozniak, J.R., McGlinch, B.P., Wall, M.H., Gold, B.S., Vinogradov, S., 2020. Battle Buddies: Rapid Deployment of a Psychological Resilience Intervention for Health Care Workers during the COVID-19 Pandemic. *Anesth. Analg.* 131, 43–54. <https://doi.org/10.1213/ANE.0000000000004912>
- Alenazi, Thamer H., BinDhim, N.F., Alenazi, M.H., Tamim, H., Almagrabi, R.S., Aljohani, S.M., H Basyouni, M., Alzubair, R.A., Althumiri, N.A., Alqahtani, S.A., 2020. Prevalence and predictors of anxiety among healthcare workers in Saudi Arabia during the COVID-19 pandemic. *J. Infect. Public Health* 13, 1645–1651. <https://doi.org/10.1016/j.jiph.2020.09.001>
- Alenazi, Thamer H., Bindhim, N.F., Alenazi, M.H., Tamim, H., Althumiri, N.A., Alqahtani, S.A., 2020. Prevalence and predictors of anxiety among healthcare workers in Saudi Arabia during the COVID-19 pandemic. *J. Infect. Public Health*. <https://doi.org/10.1016/j.jiph.2020.09.001>
- Almater, A.I., Tobaigy, M.F., Younis, A.S., Alaqeel, M.K., Abouammoh, M.A., 2020. Effect of 2019 Coronavirus Pandemic on Ophthalmologists Practicing in Saudi Arabia: A Psychological Health Assessment. *Middle East Afr. J. Ophthalmol.* 27, 79–85. [https://doi.org/10.4103/meajo.MEAJO\\_220\\_20](https://doi.org/10.4103/meajo.MEAJO_220_20)
- Alshekaili, M., Hassan, W., Al Said, N., Al Sulaimani, F., Jayapal, S.K., Al-Mawali, A., Chan, M.F., Mahadevan, S., Al-Adawi, S., 2020a. Factors associated with mental health outcomes across healthcare settings in Oman during COVID-19: Frontline versus non-

frontline healthcare workers. *BMJ Open* 10, 1–7. <https://doi.org/10.1136/bmjopen-2020-042030>

Alshekaili, M., Hassan, W., Said, N. Al, Sulaimani, F. Al, Chan, M.F., Jayapal, S.K., Al-, A., 2020b. Factors associated with mental health outcomes across healthcare settings in Oman during COVID-19: frontline frontline healthcare workers versus non- - 1–7. <https://doi.org/10.1136/bmjopen-2020-042030>

Altintas, A.K., 2017. Allen RC. Orbital metastases: When to suspect? When to biopsy?. *Middle East Afr J Ophthalmol* 2018;25:60–4. *Middle East Afr J Ophthalmol* 24, 43–47. <https://doi.org/10.4103/meajo.MEAJO>

An, Y., Yang, Y., Wang, A., Li, Y., Zhang, Q., Cheung, T., Ungvari, G.S., Qin, M.Z., An, F.R., Xiang, Y.T., 2020. Prevalence of depression and its impact on quality of life among frontline nurses in emergency departments during the COVID-19 outbreak. *J. Affect. Disord.* 276, 312–315. <https://doi.org/10.1016/j.jad.2020.06.047>

Anmella, G., Fico, G., Roca, A., Gómez-Ramiro, M., Vázquez, M., Murru, A., Pacchiarotti, I., Verdolini, N., Vieta, E., 2020. Unravelling potential severe psychiatric repercussions on healthcare professionals during the COVID-19 crisis. *J. Affect. Disord.* 273, 422–424. <https://doi.org/10.1016/j.jad.2020.05.061>

Antonijevic, J., Binic, I., Zikic, O., Manojlovic, S., Tosic-golubovic, S., Popovic, N., 2020a. Mental health of medical personnel during the COVID-19 pandemic 1–9. <https://doi.org/10.1002/brb3.1881>

Antonijevic, J., Binic, I., Zikic, O., Manojlovic, S., Tosic-Golubovic, S., Popovic, N., 2020b. Mental health of medical personnel during the COVID-19 pandemic. *Brain Behav.* 10, 1–9. <https://doi.org/10.1002/brb3.1881>

Ayhan Başer, D., Çevik, M., Gümüştakim, Ş., Başara, E., 2020. Assessment of individuals' attitude, knowledge and anxiety towards COVID-19 at the first period of the outbreak in



- Turkey: A web-based cross-sectional survey. *Int. J. Clin. Pract.* 74, 1–8.  
<https://doi.org/10.1111/ijcp.13622>
- Azoulay, E., Cariou, A., Bruneel, F., Demoule, A., Kouatchet, A., Souppart, V., Combes, A., Klouche, K., Argaud, L., Barbier, F., Jourdain, M., Reignier, J., Papazian, L., Guidet, B., Géri, G., Guisset, O., Labbé, V., Mégarbane, B., Der, G. Van, Guitton, C., Friedman, D., Pochard, F., Darmon, M., Klouche, K., Argaud, L., Barbier, F., Jourdain, M., Reignier, J., Labbé, V., Megarbane, B., Meersch, G. Van Der, Guitton, C., Azoulay, E., Darmon, M., Souppart, V., Pochard, F., Kenstish-, N., n.d. Clinicians Managing COVID-19 Patients □: A Cross-Sectional Study 1–46. <https://doi.org/10.1164/rccm.202006-2568OC>
- Barranco, R., Ventura, F., 2020. Covid-19 and infection in health-care workers: An emerging problem. *Med. Leg. J.* 002581722092369. <https://doi.org/10.1177/0025817220923694>
- Bhargava, S., Sarkar, R., Kroumpouzou, G., 2020. Mental distress in dermatologists during COVID-19 pandemic: Assessment and risk factors in a global, cross-sectional study. *Dermatol. Ther.* 33, 1–6. <https://doi.org/10.1111/dth.14161>
- Buselli, R., Corsi, M., Baldanzi, S., Chiumiento, M., Lupo, E. Del, Dell'oste, V., Bertelloni, C.A., Massimetti, G., Dell'osso, L., Cristaudo, A., Carmassi, C., 2020. Professional quality of life and mental health outcomes among health care workers exposed to SARS-CoV-2 (COVID-19). *Int. J. Environ. Res. Public Health* 17, 1–12.  
<https://doi.org/10.3390/ijerph17176180>
- Buselli, R., Corsi, M., Baldanzi, S., Chiumiento, M., Lupo, E. Del, Oste, V.D., Bertelloni, C.A., Massimetti, G., Osso, L.D., Cristaudo, A., Carmassi, C., n.d. Professional Quality of Life and Mental Health Outcomes among Health Care Workers Exposed to 2, 1–12.
- C, J.M., Blais-rochette, C., Kokou-kpolou, C.K., Noorishad, P., Mukunzi, J.N., Mcintee, S., Dalexis, R.D., Labelle, P., C, J.M., 2020. Journal Pre-proof.
- Cai, H., Tu, B., Ma, J., Chen, L., Fu, L., Jiang, Y., Zhuang, Q., 2020. Psychological impact

- and coping strategies of frontline medical staff in Hunan between January and March 2020 during the outbreak of coronavirus disease 2019 (COVID) in Hubei, China. *Med. Sci. Monit.* 26, 1–16. <https://doi.org/10.12659/MSM.924171>
- Cai, W., Lian, B., Song, X., Hou, T., Deng, G., Li, H., 2020. A cross-sectional study on mental health among health care workers during the outbreak of Corona Virus Disease 2019. *Asian J. Psychiatr.* 51, 102111. <https://doi.org/10.1016/j.ajp.2020.102111>
- Caillet, A., Coste, C., Sanchez, R., Allaouchiche, B., 2020a. Psychological Impact of COVID-19 on ICU Caregivers. *Anaesth. Crit. Care Pain Med.* 39, 717–722. <https://doi.org/10.1016/j.accpm.2020.08.006>
- Caillet, A., Coste, C., Sanchez, R., Allaouchiche, B., 2020b. na of. *Anaesth. Crit. Care Pain Med.* <https://doi.org/10.1016/j.accpm.2020.08.006>
- Chen, J., Liu, X., Wang, D., Jin, Y., He, M., Ma, Y., Zhao, X., Song, S., Zhang, L., Xiang, X., Yang, L., Song, J., Bai, T., Hou, X., 2020. Risk factors for depression and anxiety in healthcare workers deployed during the COVID-19 outbreak in China. *Soc. Psychiatry Psychiatr. Epidemiol.* <https://doi.org/10.1007/s00127-020-01954-1>
- Chen, P., Lei, J., Chen, F., Zhou, B., 2020. Experiences and perceptions risk of health-care workers from coronavirus: A protocol for systematic review. *Medicine (Baltimore)*. 99, e20308. <https://doi.org/10.1097/MD.00000000000020308>
- Chen, Q., Liang, M., Li, Y., Guo, J., Fei, D., Wang, L., He, L., Sheng, C., Cai, Y., Li, X., Wang, J., Zhang, Z., 2020. Mental health care for medical staff in China during the COVID-19 outbreak. *The Lancet Psychiatry* 7, e15–e16. [https://doi.org/10.1016/S2215-0366\(20\)30078-X](https://doi.org/10.1016/S2215-0366(20)30078-X)
- Chen, X., Zhang, S.X., Jahanshahi, A.A., Alvarez-Risco, A., Dai, H., Li, J., Ibarra, V.G., 2020. Belief in a COVID-19 conspiracy theory as a predictor of mental health and well-being of health care workers in Ecuador: Cross-sectional survey study. *JMIR Public*

Heal. Surveill. 6, 1–7. <https://doi.org/10.2196/20737>

Cheng, F.F., Zhan, S.H., Xie, A.W., Cai, S.Z., Hui, L., Kong, X.X., Tian, J.M., Yan, W.H.,  
2020. Anxiety in Chinese pediatric medical staff during the outbreak of Coronavirus  
Disease 2019: A cross-sectional study. *Transl. Pediatr.* 9, 231–236.  
<https://doi.org/10.21037/TP.2020.04.02>

Chew, N.W.S., Lee, G.K.H., Tan, B.Y.Q., Jing, M., Goh, Y., Ngiam, N.J.H., Yeo, L.L.L.,  
Ahmad, A., Ahmed Khan, F., Napoleon Shanmugam, G., Sharma, A.K., Komalkumar,  
R.N., Meenakshi, P.V., Shah, K., Patel, B., Chan, B.P.L., Sunny, S., Chandra, B., Ong,  
J.J.Y., Paliwal, P.R., Wong, L.Y.H., Sagayanathan, R., Chen, J.T., Ying Ng, A.Y., Teoh,  
H.L., Tsivgoulis, G., Ho, C.S., Ho, R.C., Sharma, V.K., 2020. A multinational,  
multicentre study on the psychological outcomes and associated physical symptoms  
amongst healthcare workers during COVID-19 outbreak. *Brain. Behav. Immun.* 88,  
559–565. <https://doi.org/10.1016/j.bbi.2020.04.049>

Civantos, A.M., Byrnes, Y., Chang, C., Prasad, A., Chorath, K., Poonia, S.K., Jenks, C.M.,  
Bur, A.M., Thakkar, P., Graboyes, E.M., Seth, R., Trosman, S., Wong, A., Laitman,  
B.M., Harris, B.N., Shah, J., Stubbs, V., Choby, G., Long, Q., Rassekh, C.H., Thaler, E.,  
Rajasekaran, K., 2020. Mental health among otolaryngology resident and attending  
physicians during the COVID-19 pandemic: National study. *Head Neck* 42, 1597–1609.  
<https://doi.org/10.1002/hed.26292>

de Burgos-Berdud, I., Valdés-Florido, M.J., López-Díaz, Á., 2021. Are healthcare workers  
during the COVID-19 pandemic at risk of psychosis? Findings from a scoping review.  
*Gen. Hosp. Psychiatry.* <https://doi.org/10.1016/j.genhosppsy.2020.06.015>

Di Tella, M., Romeo, A., Benfante, A., Castelli, L., 2020. Mental health of healthcare  
workers during the COVID-19 pandemic in Italy. *J. Eval. Clin. Pract.* 26, 1583–1587.  
<https://doi.org/10.1111/jep.13444>

Elbay, R.Y., Kurtulmuş, A., Arpacioğlu, S., Karadere, E., 2020a. Depression, anxiety, stress levels of physicians and associated factors in Covid-19 pandemics. *Psychiatry Res.* 290. <https://doi.org/10.1016/j.psychres.2020.113130>

Elbay, R.Y., Kurtulmuş, A., Arpacioğlu, S., Karadere, E., 2020b. Depression, anxiety, stress levels of physicians and associated factors in Covid-19 pandemics. *Psychiatry Res.* 290, 1–5. <https://doi.org/10.1016/j.psychres.2020.113130>

Elhadi, M., Msherghi, A., Elgzairi, M., Alhashimi, A., Bouhuwaish, A., Biala, M., Abuelmeda, S., Khel, S., Khaled, A., Alsou, A., Elmabrouk, A., Bin, F., Alhadi, B., Alhaddad, S., Elmabrouk, O., Ben, T., Alameen, H., Zaid, A., Elhadi, A., Albakoush, A., 2020a. Psychological status of healthcare workers during the civil war and COVID- 19 pandemic□: A cross-sectional study 137. <https://doi.org/10.1016/j.jpsychores.2020.110221>

Elhadi, M., Msherghi, A., Elgzairi, M., Alhashimi, A., Bouhuwaish, A., Biala, M., Abuelmeda, S., Khel, S., Khaled, A., Alsoufi, A., Elmabrouk, A., Alshiteewi, F. Bin, Alhadi, B., Alhaddad, S., Gaffaz, R., Elmabrouk, O., Hamed, T. Ben, Alameen, H., Zaid, A., Elhadi, A., Albakoush, A., 2020b. Psychological status of healthcare workers during the civil war and COVID-19 pandemic: A cross-sectional study. *J. Psychosom. Res.* 137. <https://doi.org/10.1016/j.jpsychores.2020.110221>

Fadhli, M., Fauzi, M., Mohd, H., Robot, R.M., n.d. Doctors ' Mental Health in the Midst of COVID-19 Pandemic□: The Roles of Work Demands and Recovery Experiences 19.

Fauzi, M.F.M., Yusoff, H.M., Robot, R.M., Saruan, N.A.M., Ismail, K.I., Haris, A.F.M., 2020. Doctors' mental health in the midst of covid-19 pandemic: The roles of work demands and recovery experiences. *Int. J. Environ. Res. Public Health* 17, 1–16. <https://doi.org/10.3390/ijerph17197340>

Gallopeni, F., Bajraktari, I., Selmani, E., Tahirbegolli, I.A., Sahiti, G., Muastafa, A., Bojaj,

- G., Muharremi, V.B., Tahirbegolli, B., 2020. Anxiety and depressive symptoms among healthcare professionals during the Covid-19 pandemic in Kosovo: A cross sectional study. *J. Psychosom. Res.* 137, 110212.  
<https://doi.org/10.1016/j.jpsychores.2020.110212>
- Gan, W.H., Lim, J.W., Koh, D., 2020. Preventing Intra-hospital Infection and Transmission of Coronavirus Disease 2019 in Health-care Workers. *Saf. Health Work.*  
<https://doi.org/10.1016/j.shaw.2020.03.001>
- Hall, H., 2020. The effect of the COVID-19 pandemic on healthcare workers' mental health. *JAAPA* 33, 45–48. <https://doi.org/10.1097/01.JAA.0000669772.78848.8c>
- Herrero San Martin, A., Parra Serrano, J., Diaz Cambriles, T., Arias Arias, E.M., Muñoz Méndez, J., del Yerro Álvarez, M.J., González Sánchez, M., 2020. Sleep characteristics in health workers exposed to the COVID-19 pandemic. *Sleep Med.* 75, 388–394.  
<https://doi.org/10.1016/j.sleep.2020.08.013>
- Hong, S., Ai, M., Xu, X., Wang, W., Chen, J., Zhang, Q., Wang, L., Kuang, L., 2020. Immediate psychological impact on nurses working at 42 government-designated hospitals during COVID-19 outbreak in China: A cross-sectional study. *Nurs. Outlook* 0, 1–7. <https://doi.org/10.1016/j.outlook.2020.07.007>
- Huang, Y., Zhao, N., 2020. Mental health burden for the public affected by the COVID-19 outbreak in China: Who will be the high-risk group? *Psychol. Heal. Med.* 00, 1–12.  
<https://doi.org/10.1080/13548506.2020.1754438>
- Janati Idrissi, A., Lamkaddem, A., Benouajjit, A., Ben El Bouazzaoui, M., El Houari, F., Alami, M., Labyad, S., Chahidi, A., Benjelloun, M., Rabhi, S., Kissani, N., Zarhbouch, B., Ouazzani, R., Kadiri, F., Alouane, R., Elbiaze, M., Boujraf, S., El Fakir, S., Souirti, Z., 2020. Sleep quality and mental health in the context of COVID-19 pandemic and lockdown in Morocco. *Sleep Med.* 74, 248–253.

<https://doi.org/10.1016/j.sleep.2020.07.045>

Johnson, S.U., Ebrahimi, O. V., Hoffart, A., 2020. PTSD symptoms among health workers and public service providers during the COVID-19 outbreak. *PLoS One* 15, 1–13.

<https://doi.org/10.1371/journal.pone.0241032>

Juan, Y., Yuanyuan, C., Qiuxiang, Y., Cong, L., Xiaofeng, L., Yundong, Z., Jing, C., Peifeng, Q., Yan, L., Xiaojiao, X., Yujie, L., 2020. Psychological distress surveillance and related impact analysis of hospital staff during the COVID-19 epidemic in Chongqing, China. *Compr. Psychiatry* 103, 152198. <https://doi.org/10.1016/j.comppsy.2020.152198>

*Compr. Psychiatry* 103, 152198. <https://doi.org/10.1016/j.comppsy.2020.152198>

Jun, J., Tucker, S., Melnyk, B.M., 2020. Clinician Mental Health and Well-Being During Global Healthcare Crises: Evidence Learned From Prior Epidemics for COVID-19 Pandemic. *Worldviews Evidence-Based Nurs.* 17, 182–184.

<https://doi.org/10.1111/wvn.12439>

Kang, L., Li, Y., Hu, S., Chen, M., Yang, C., Yang, B.X., Wang, Y., Hu, J., Lai, J., Ma, X., Chen, J., Guan, L., Wang, G., Ma, H., Liu, Z., 2020a. The mental health of medical workers in Wuhan, China dealing with the 2019 novel coronavirus. *The Lancet Psychiatry* 7, e14. [https://doi.org/10.1016/S2215-0366\(20\)30047-X](https://doi.org/10.1016/S2215-0366(20)30047-X)

*Psychiatry* 7, e14. [https://doi.org/10.1016/S2215-0366\(20\)30047-X](https://doi.org/10.1016/S2215-0366(20)30047-X)

Kang, L., Ma, S., Chen, M., Yang, J., Wang, Y., Li, R., Yao, L., Bai, H., Cai, Z., Xiang Yang, B., Hu, S., Zhang, K., Wang, G., Ma, C., Liu, Z., 2020b. Impact on mental health and perceptions of psychological care among medical and nursing staff in Wuhan during the 2019 novel coronavirus disease outbreak: A cross-sectional study. *Brain. Behav. Immun.* 87, 11–17. <https://doi.org/10.1016/j.bbi.2020.03.028>

*Immun.* 87, 11–17. <https://doi.org/10.1016/j.bbi.2020.03.028>

Kannampallil, T.G., Goss, C.W., Evanoff, B.A., Strickland, J.R., McAlister, R.P., Duncan, J., 2020. Exposure to COVID-19 patients increases physician trainee stress and burnout. *PLoS One* 15, 1–12. <https://doi.org/10.1371/journal.pone.0237301>

*PLoS One* 15, 1–12. <https://doi.org/10.1371/journal.pone.0237301>

Keubo, F.R.N., Mboua, P.C., Tadongfack, T.D., Tchoffo, E.F., Tatang, C.T., Zeuna, J.I.,

- Noupoue, E.M., Tsoplifack, C.B., Folefack, G.O., 2020. Psychological distress among health care professionals of the three COVID-19 most affected Regions in Cameroon: Prevalence and associated factors. *Ann. Médico-psychologiques, Rev. Psychiatr.* <https://doi.org/10.1016/j.amp.2020.08.012>
- Kisely, S., Warren, N., McMahon, L., Dalais, C., Henry, I., Siskind, D., 2020. Occurrence, prevention, and management of the psychological effects of emerging virus outbreaks on healthcare workers: rapid review and meta-analysis. *BMJ* 369, m1642. <https://doi.org/10.1136/bmj.m1642>
- Koksal, E., Dost, B., Terzi, Ö., Ustun, Y.B., Özdin, S., Bilgin, S., 2020a. Evaluation of Depression and Anxiety Levels and Related Factors Among Operating Theater Workers During the Novel Coronavirus (COVID-19) Pandemic. *J. Perianesthesia Nurs.* 35, 472–477. <https://doi.org/10.1016/j.jopan.2020.06.017>
- Koksal, E., Dost, B., Ustun, Y.B., 2020b. Evaluation of Depression and Anxiety Levels and Related Factors Among Operating Theater Workers During the Novel Coronavirus ( COVID-19 ) Pandemic 35, 472–477. <https://doi.org/10.1016/j.jopan.2020.06.017>
- Korkmaz, S., Kazgan, A., Çekiç, S., Tartar, A.S., Balcı, H.N., Atmaca, M., 2020. The anxiety levels, quality of sleep and life and problem-solving skills in healthcare workers employed in COVID-19 services. *J. Clin. Neurosci.* 80, 131–136. <https://doi.org/10.1016/j.jocn.2020.07.073>
- Krishnamoorthy, Y., Nagarajan, R., Saya, G.K., Menon, V., 2020. Prevalence of psychological morbidities among general population, healthcare workers and COVID-19 patients amidst the COVID-19 pandemic: A systematic review and meta-analysis. *Psychiatry Res.* 293, 113382. <https://doi.org/10.1016/j.psychres.2020.113382>
- Labrague, L.J., De los Santos, J.A.A., 2020. COVID-19 anxiety among front-line nurses: Predictive role of organisational support, personal resilience and social support. *J. Nurs.*

Manag. 28, 1653–1661. <https://doi.org/10.1111/jonm.13121>

Lai, J., Ma, S., Wang, Y., Cai, Z., Hu, J., Wei, N., Wu, J., Du, H., Chen, T., Li, R., Tan, H.,

Kang, L., Yao, L., Huang, M., Wang, H., Wang, G., Liu, Z., Hu, S., 2020. Factors Associated With Mental Health Outcomes Among Health Care Workers Exposed to Coronavirus Disease 2019. *JAMA Netw. open* 3, e203976.

<https://doi.org/10.1001/jamanetworkopen.2020.3976>

Lai, X., Wang, M., Qin, C., Tan, L., Ran, L., Chen, D., Zhang, H., Shang, K., Xia, C., Wang,

S., Xu, S., Wang, W., 2020. Coronavirus Disease 2019 (COVID-2019) Infection Among Health Care Workers and Implications for Prevention Measures in a Tertiary Hospital in Wuhan, China. *JAMA Netw. open* 3, e209666.

<https://doi.org/10.1001/jamanetworkopen.2020.9666>

Lee, M.C.C., Thampi, S., Chan, H.P., Khoo, D., Chin, B.Z.B., Foo, D.P.X., Lua, C.B.,

Lewin, B., Jacob, R., 2020. Psychological distress during the COVID-19 pandemic amongst anaesthesiologists and nurses. *Br. J. Anaesth.* 125, e384–e386.

<https://doi.org/10.1016/j.bja.2020.07.005>

Li, G., Miao, J., Wang, H., Xu, S., Sun, W., Fan, Y., Zhang, C., Zhu, S., Zhu, Z., Wang, W.,

2020. Psychological impact on women health workers involved in COVID-19 outbreak in Wuhan: A cross-sectional study. *J. Neurol. Neurosurg. Psychiatry* 91, 895–897.

<https://doi.org/10.1136/jnnp-2020-323134>

Li, R., Chen, Y., Lv, J., Liu, L., Zong, S., Li, Hanxia, Li, Hong, 2020. Anxiety and related

factors in frontline clinical nurses fighting COVID-19 in Wuhan. *Medicine (Baltimore)*. 99, e21413. <https://doi.org/10.1097/MD.00000000000021413>

Liang, Y., Wu, K., Zhou, Yongjie, Huang, X., Zhou, Yueyue, Liu, Z., 2020. Mental health in

frontline medical workers during the 2019 novel coronavirus disease epidemic in China: A comparison with the general population. *Int. J. Environ. Res. Public Health* 17, 1–12.



<https://doi.org/10.3390/ijerph17186550>

Liu, C.Y., Yang, Y.Z., Zhang, X.M., Xu, X., Dou, Q.L., Zhang, W.W., 2020. The prevalence and influencing factors for anxiety in medical workers fighting COVID-19 in China: A cross-sectional survey. medRxiv. <https://doi.org/10.1101/2020.03.05.20032003>

Liu, C.Y., Yang, Y.Z., Zhang, X.M., Xu, X., Dou, Q.L., Zhang, W.W., Cheng, A.S.K., 2020. The prevalence and influencing factors in anxiety in medical workers fighting COVID-19 in China: A cross-sectional survey. *Epidemiol. Infect.* 148.

<https://doi.org/10.1017/S0950268820001107>

Liu, M., Cheng, S.Z., Xu, K.W., Yang, Y., Zhu, Q.T., Zhang, H., Yang, D.Y., Cheng, S.Y., Xiao, H., Wang, J.W., Yao, H.R., Cong, Y.T., Zhou, Y.Q., Peng, S., Kuang, M., Hou, F.F., Cheng, K.K., Xiao, H.P., 2020. Use of personal protective equipment against coronavirus disease 2019 by healthcare professionals in Wuhan, China: Cross sectional study. *BMJ* 369, 6–11. <https://doi.org/10.1136/bmj.m2195>

Liu, Y., Wang, L., Chen, L., Zhang, X., Bao, L., Shi, Y., 2020a. Mental Health Status of Paediatric Medical Workers in China During the COVID-19 Outbreak. *Front. Psychiatry* 11, 1–7. <https://doi.org/10.3389/fpsy.2020.00702>

Liu, Y., Wang, L., Chen, L., Zhang, X., Bao, L., Shi, Y., 2020b. Mental Health Status of Paediatric Medical Workers in China During the COVID-19 Outbreak 11, 1–7. <https://doi.org/10.3389/fpsy.2020.00702>

Liu, Y.E., Zhai, Z.C., Han, Y.H., Liu, Y.L., Liu, F.P., Hu, D.Y., 2020. Experiences of front-line nurses combating coronavirus disease-2019 in China: A qualitative analysis. *Public Health Nurs.* 1–7. <https://doi.org/10.1111/phn.12768>

Lu, W., Wang, H., Lin, Y., Li, L., 2020. Psychological status of medical workforce during the COVID-19 pandemic: A cross-sectional study. *Psychiatry Res.* 288, 1–5. <https://doi.org/10.1016/j.psychres.2020.112936>

- Luceño-Moreno, L., Talavera-Velasco, B., García-Albuérne, Y., Martín-García, J., 2020. Symptoms of posttraumatic stress, anxiety, depression, levels of resilience and burnout in spanish health personnel during the COVID-19 pandemic. *Int. J. Environ. Res. Public Health* 17, 1–29. <https://doi.org/10.3390/ijerph17155514>
- McKay, D., Heisler, M., Mishori, R., Catton, H., Kloiber, O., 2020. Attacks against health-care personnel must stop, especially as the world fights COVID-19. *Lancet* 395, 1743–1745. [https://doi.org/10.1016/S0140-6736\(20\)31191-0](https://doi.org/10.1016/S0140-6736(20)31191-0)
- Nie, A., Su, X., Zhang, S., Guan, W., Li, J., 2020. Psychological impact of COVID-19 outbreak on frontline nurses: A cross-sectional survey study. *J. Clin. Nurs.* 29, 4217–4226. <https://doi.org/10.1111/jocn.15454>
- Ning, X., Yu, F., Huang, Qin, Li, X., Luo, Y., Huang, Qing, Chen, C., 2020. The mental health of neurological doctors and nurses in Hunan Province, China, during the COVID-19 outbreak 1–9. <https://doi.org/10.21203/rs.3.rs-22061/v1>
- Pouralizadeh, M., Bostani, Z., Maroufizadeh, S., Ghanbari, A., Khoshbakht, M., Alavi, S.A., Ashrafi, S., 2020. Anxiety and depression and the related factors in nurses of Guilan University of Medical Sciences hospitals during COVID-19: A web-based cross-sectional study. *Int. J. Africa Nurs. Sci.* 13, 100233. <https://doi.org/10.1016/j.ijans.2020.100233>
- Prasad, A., Civantos, A.M., Byrnes, Y., Chorath, K., Poonia, S., Chang, C., Graboyes, E.M., Bur, A.M., Thakkar, P., Deng, J., Seth, R., Trosman, S., Wong, A., Laitman, B.M., Shah, J., Stubbs, V., Long, Q., Choby, G., Rassekh, C.H., Thaler, E.R., Rajasekaran, K., 2020. Snapshot Impact of COVID-19 on Mental Wellness in Nonphysician Otolaryngology Health Care Workers: A National Study. *OTO Open* 4, 2473974X2094883. <https://doi.org/10.1177/2473974x20948835>
- Qiu, D., Yu, Y., Li, R.Q., Li, Y.L., Xiao, S.Y., 2020. Prevalence of sleep disturbances in

- Chinese healthcare professionals: a systematic review and meta-analysis. *Sleep Med.* 67, 258–266. <https://doi.org/10.1016/j.sleep.2019.01.047>
- Que, J., Shi, L., Deng, J., Liu, J., Zhang, L., Wu, S., Gong, Y., Huang, W., Yuan, K., Yan, W., Sun, Y., Ran, M., Bao, Y., Lu, L., 2020. Psychological impact of the covid-19 pandemic on healthcare workers: A cross-sectional study in China. *Gen. Psychiatry* 33, 1–12. <https://doi.org/10.1136/gpsych-2020-100259>
- Rossi, R., Socci, V., Pacitti, F., Di Lorenzo, G., Di Marco, A., Siracusano, A., Rossi, A., 2020. Mental Health Outcomes Among Frontline and Second-Line Health Care Workers During the Coronavirus Disease 2019 (COVID-19) Pandemic in Italy. *JAMA Netw. open* 3, e2010185. <https://doi.org/10.1001/jamanetworkopen.2020.10185>
- Şahin, M.K., Aker, S., Şahin, G., Karabekiroğlu, A., 2020a. Prevalence of Depression, Anxiety, Distress and Insomnia and Related Factors in Healthcare Workers During COVID-19 Pandemic in Turkey. *J. Community Health* 45, 1168–1177. <https://doi.org/10.1007/s10900-020-00921-w>
- Şahin, M.K., Aker, S., Şahin, G., Karabekiroğlu, A., 2020b. Prevalence of Depression, Anxiety, Distress and Insomnia and Related Factors in Healthcare Workers During COVID-19 Pandemic in Turkey. *J. Community Health* 45, 1168–1177. <https://doi.org/10.1007/s10900-020-00921-w>
- Salopek-Žiha, D., Hlavati, M., Gvozdanovi, Z., Gaši, M., Placento, H., Jaki, H., Klapan, D., Šimi, H., 2020. Differences in distress and coping with the covid-19 stressor in nurses and physicians. *Psychiatr. Danub.* 32, 287–293. <https://doi.org/10.24869/PSYD.2020.287>
- Sandesh, R., Shahid, W., Dev, K., Mandhan, N., Shankar, P., Shaikh, A., Rizwan, A., 2020. Impact of COVID-19 on the Mental Health of Healthcare Professionals in Pakistan. *Cureus* 12, 3–7. <https://doi.org/10.7759/cureus.8974>

- Santabárbara, J., Bueno-Notivol, J., Lipnicki, D.M., Olaya, B., Pérez-Moreno, M., Gracia-García, P., Idoiaga-Mondragon, N., Ozamiz-Etxebarria, N., 2021. Prevalence of anxiety in health care professionals during the COVID-19 pandemic: A rapid systematic review (on published articles in Medline) with meta-analysis. *Prog. Neuro-Psychopharmacology Biol. Psychiatry* 107. <https://doi.org/10.1016/j.pnpbp.2021.110244>
- Selamu, M., Thornicroft, G., Fekadu, A., Hanlon, C., 2017. Conceptualisation of job-related wellbeing, stress and burnout among healthcare workers in rural Ethiopia: A qualitative study. *BMC Health Serv. Res.* 17, 1–11. <https://doi.org/10.1186/s12913-017-2370-5>
- Shah, N., Raheem, A., Sideris, M., Velauthar, L., Saeed, F., 2020. Mental health amongst obstetrics and gynaecology doctors during the COVID-19 pandemic: Results of a UK-wide study. *Eur. J. Obstet. Gynecol. Reprod. Biol.* 253, 90–94. <https://doi.org/10.1016/j.ejogrb.2020.07.060>
- Shahrour, G., 2020. Acute stress disorder , coping self-efficacy and subsequent psychological distress among nurses amid COVID-19 1–10. <https://doi.org/10.1111/jonm.13124>
- Shahrour, G., Dardas, L.A., 2020. Acute stress disorder, coping self-efficacy and subsequent psychological distress among nurses amid COVID-19. *J. Nurs. Manag.* 28, 1686–1695. <https://doi.org/10.1111/jonm.13124>
- Shaukat, N., Ali, D.M., Razzak, J., 2020. Physical and mental health impacts of COVID-19 on healthcare workers: A scoping review. *Int. J. Emerg. Med.* 13, 1–8. <https://doi.org/10.1186/s12245-020-00299-5>
- Shechter, A., Diaz, F., Moise, N., Anstey, D.E., Ye, S., Agarwal, S., Birk, J.L., Brodie, D., Cannone, D.E., Chang, B., Claassen, J., Cornelius, T., Derby, L., Dong, M., Givens, R.C., Hochman, B., Homma, S., Kronish, I.M., Lee, S.A.J., Manzano, W., Mayer, L.E.S., McMurry, C.L., Moitra, V., Pham, P., Rabbani, L.R., Rivera, R.R., Schwartz, A., Schwartz, J.E., Shapiro, P.A., Shaw, K., Sullivan, A.M., Vose, C., Wasson, L.,

- Edmondson, D., Abdalla, M., 2020. Psychological distress, coping behaviors, and preferences for support among New York healthcare workers during the COVID-19 pandemic. *Gen. Hosp. Psychiatry* 66, 1–8.  
<https://doi.org/10.1016/j.genhosppsych.2020.06.007>
- Si, M., Su, X., Jiang, Y., Wang, W., Gu, X., Ma, L., Li, J., Zhang, S., Ren, Z.-F., Liu, Y.-L., Qiao, Y.-L., 2020. The Psychological Impact of COVID-19 on Medical Care Workers in China. *SSRN Electron. J.* 1–13. <https://doi.org/10.2139/ssrn.3592642>
- Skoda, E.M., Teufel, M., Stang, A., Jöckel, K.H., Junne, F., Weismüller, B., Hetkamp, M., Musche, V., Kohler, H., Dörrie, N., Schweda, A., Bäuerle, A., 2020. Psychological burden of healthcare professionals in Germany during the acute phase of the COVID-19 pandemic: Differences and similarities in the international context. *J. Public Heal. (United Kingdom)* 42, 688–695. <https://doi.org/10.1093/pubmed/fdaa124>
- Stojanov, J., Malobabic, M., Stanojevic, G., Stevic, M., Milosevic, V., Stojanov, A., 2020. Quality of sleep and health-related quality of life among health care professionals treating patients with coronavirus disease-19. *Int. J. Soc. Psychiatry.*  
<https://doi.org/10.1177/0020764020942800>
- Suryavanshi, N., Kadam, A., Dhumal, G., Nimkar, S., Mave, V., Gupta, A., Cox, S.R., Gupte, N., 2020. Mental health and quality of life among healthcare professionals during the COVID-19 pandemic in India. *Brain Behav.* 10, 1–12. <https://doi.org/10.1002/brb3.1837>
- Teo, W.Z.Y., Soo, Y.E., Yip, C., Lizhen, O., Chun-Tsu, L., 2020. The psychological impact of COVID-19 on ‘hidden’ frontline healthcare workers. *Int. J. Soc. Psychiatry.*  
<https://doi.org/10.1177/0020764020950772>
- Tian, T., Meng, F., Pan, W., Zhang, S., Cheung, T., Ng, C.H., Li, X.H., Xiang, Y.T., 2020. Mental health burden of frontline health professionals in screening and caring the imported COVID-19 patients in China during the pandemic. *Psychol. Med.*

<https://doi.org/10.1017/S0033291720002093>

- Walton, M., Murray, E., Christian, M.D., 2020. Mental health care for medical staff and affiliated healthcare workers during the COVID-19 pandemic. *Eur. Hear. J. Acute Cardiovasc. Care* 9, 241–247. <https://doi.org/10.1177/2048872620922795>
- Wang, H., Huang, D., Huang, H., Zhang, J., Guo, L., Liu, Y., Ma, H., Geng, Q., 2020. The Psychological Impact of COVID-19 Pandemic on Medical Staff in Guangdong, China: A Cross-Sectional Study. *Psychol. Med.* <https://doi.org/10.1017/S0033291720002561>
- Wang, H., Liu, Y., Hu, K., Zhang, M., Du, M., Huang, H., Yue, X., 2020. Healthcare workers' stress when caring for COVID-19 patients: An altruistic perspective. *Nurs. Ethics.* <https://doi.org/10.1177/0969733020934146>
- Wang, L.Q., Zhang, Meng, Liu, G.M., Nan, S.Y., Li, T., Xu, L., Xue, Y., Zhang, Min, Wang, L., Qu, Y.D., Liu, F., 2020. Psychological impact of coronavirus disease (2019) (COVID-19) epidemic on medical staff in different posts in China: A multicenter study. *J. Psychiatr. Res.* 129, 198–205. <https://doi.org/10.1016/j.jpsychires.2020.07.008>
- Wang, S., Wen, X., Dong, Y., Liu, B., Cui, M., 2020. Psychological Influence of Coronavirus Disease 2019 (COVID-19) Pandemic on the General Public, Medical Workers, and Patients With Mental Disorders and its Countermeasures. *Psychosomatics* 61, 616–624. <https://doi.org/10.1016/j.psym.2020.05.005>
- Wang, S., Xie, L., Xu, Y., Yu, S., Yao, B., Xiang, D., 2020. Sleep disturbances among medical workers during the outbreak of COVID-2019. *Occup. Med. (Chic. Ill)*. 70, 364–369. <https://doi.org/10.1093/occmed/kqaa074>
- Wang, Y., Ma, S., Yang, C., Cai, Z., Hu, S., Zhang, B., Tang, S., Bai, H., Guo, X., Wu, J., Du, H., Kang, L., Tan, H., Li, R., Yao, L., Wang, G., 2020a. Acute psychological effects of Coronavirus Disease 2019 outbreak among healthcare workers in China: a cross-sectional study. *Transl. Psychiatry.* <https://doi.org/10.1038/s41398-020-01031-w>

- Wang, Y., Ma, S., Yang, C., Cai, Z., Hu, S., Zhang, B., Tang, S., Bai, H., Guo, X., Wu, J., Du, H., Kang, L., Tan, H., Li, R., Yao, L., Wang, G., Liu, Z., 2020b. Acute psychological effects of Coronavirus Disease 2019 outbreak among healthcare workers in China: a cross-sectional study. *Transl. Psychiatry* 10. <https://doi.org/10.1038/s41398-020-01031-w>
- Wańkiewicz, P., Szylińska, A., Rotter, I., 2020. Assessment of mental health factors among health professionals depending on their contact with covid-19 patients. *Int. J. Environ. Res. Public Health* 17, 1–8. <https://doi.org/10.3390/ijerph17165849>
- Wasim, T., Raana, G., Bushra, N., Riaz, A., 2020. Effect of COVID-19 Pandemic on Mental Wellbeing of Healthcare Workers in Tertiary Care Hospital. *Ann. King Edward Med. Univ.* 26, 140–144.
- Wilson, W., Raj, J.P., Rao, S., Ghiya, M., Nedungalaparambil, N.M., Mundra, H., Mathew, R., 2020. Prevalence and Predictors of Stress, anxiety, and Depression among Healthcare Workers Managing COVID-19 Pandemic in India: A Nationwide Observational Study. *Indian J. Psychol. Med.* 42, 353–358. <https://doi.org/10.1177/0253717620933992>
- Xiang, Y.T., Yang, Y., Li, W., Zhang, L., Zhang, Q., Cheung, T., Ng, C.H., 2020. Timely mental health care for the 2019 novel coronavirus outbreak is urgently needed. *The Lancet Psychiatry* 7, 228–229. [https://doi.org/10.1016/S2215-0366\(20\)30046-8](https://doi.org/10.1016/S2215-0366(20)30046-8)
- Xiao, X., Zhu, X., Fu, S., Hu, Y., Li, X., Xiao, J., 2020. Psychological impact of healthcare workers in China during COVID-19 pneumonia epidemic: A multi-center cross-sectional survey investigation. *J. Affect. Disord.* 274, 405–410. <https://doi.org/10.1016/j.jad.2020.05.081>
- Xiaoming, X., Ming, A., Su, H., Wo, W., Jianmei, C., Qi, Z., Hua, H., Xuemei, L., Lixia, W., Jun, C., Lei, S., Zhen, L., Lian, D., Jing, L., Handan, Y., Haitang, Q., Xiaoting, H.,

- Xiaorong, C., Ran, C., Qinghua, L., Xinyu, Z., Jian, T., Jing, T., Guanghua, J., Zhiqin, H., Nkundimana, B., Li, K., 2020. The psychological status of 8817 hospital workers during COVID-19 Epidemic: A cross-sectional study in Chongqing. *J. Affect. Disord.* 276, 555–561. <https://doi.org/10.1016/j.jad.2020.07.092>
- Xing, J., Sun, N., Xu, J., Geng, S., Li, Y., 2020. Study of the mental health status of medical personnel dealing with new coronavirus pneumonia. *PLoS One* 15, 1–10. <https://doi.org/10.1371/journal.pone.0233145>
- Yáñez, J.A., Jahanshahi, A.A., Alvarez-Risco, A., Li, J., Zhang, S.X., 2020. Anxiety, distress, and turnover intention of healthcare workers in Peru by their distance to the epicenter during the COVID-19 crisis. *Am. J. Trop. Med. Hyg.* 103, 1614–1620. <https://doi.org/10.4269/ajtmh.20-0800>
- Yang, X., Zhang, Y., Li, S., Chen, X., 2020a. Risk factors for anxiety of otolaryngology healthcare workers in Hubei province fighting coronavirus disease 2019 ( COVID □ 19 ). *Soc. Psychiatry Psychiatr. Epidemiol.* 2019. <https://doi.org/10.1007/s00127-020-01928-3>
- Yang, X., Zhang, Y., Li, S., Chen, X., 2020b. Risk factors for anxiety of otolaryngology healthcare workers in Hubei province fighting coronavirus disease 2019 (COVID-19). *Soc. Psychiatry Psychiatr. Epidemiol.* 2019. <https://doi.org/10.1007/s00127-020-01928-3>
- Yin, Q., Sun, Z., Liu, T., Ni, X., Deng, X., Jia, Y., Shang, Z., Zhou, Y., Liu, W., 2020. Posttraumatic stress symptoms of health care workers during the corona virus disease 2019. *Clin. Psychol. Psychother.* 27, 384–395. <https://doi.org/10.1002/cpp.2477>
- Zhan, M., Qin, Y., Xue, X., Zhu, S., 2020. Death from COVID-19 of 23 health care workers in China. *N. Engl. J. Med.* 382, 2267–2268. <https://doi.org/10.1056/NEJMc2005696>
- Zhan, Y., Liu, Y., Liu, H., Li, M., Shen, Y., Gui, L., Zhang, J., Luo, Z., Tao, X., Yu, J., 2020.



Factors associated with insomnia among Chinese frontline nurses Fighting against COVID-19 in Wuhan: A cross-sectional survey. *J. Nurs. Manag.*

<https://doi.org/10.1111/jonm.13094>

Zhang, M., Zhou, M., Tang, F., Wang, Y., Nie, H., Zhang, L., You, G., 2020. Knowledge, attitude, and practice regarding COVID-19 among healthcare workers in Henan, China. *J. Hosp. Infect.* 105, 183–187. <https://doi.org/10.1016/j.jhin.2020.04.012>

Zhang, S.X., Liu, J., Afshar Jahanshahi, A., Nawaser, K., Yousefi, A., Li, J., Sun, S., 2020. At the height of the storm: Healthcare staff's health conditions and job satisfaction and their associated predictors during the epidemic peak of COVID-19. *Brain. Behav. Immun.* 87, 144–146. <https://doi.org/10.1016/j.bbi.2020.05.010>

Zhang, W.R., Wang, K., Yin, L., Zhao, W.F., Xue, Q., Peng, M., Min, B.Q., Tian, Q., Leng, H.X., Du, J.L., Chang, H., Yang, Y., Li, W., Shangguan, F.F., Yan, T.Y., Dong, H.Q., Han, Y., Wang, Y.P., Cosci, F., Wang, H.X., 2020. Mental Health and Psychosocial Problems of Medical Health Workers during the COVID-19 Epidemic in China. *Psychother. Psychosom.* 89, 242–250. <https://doi.org/10.1159/000507639>

Zhou, B., She, J., Wang, Y., Ma, X., 2020. *cept cr ip t Ac ce pt us cr t 1–14.*

Zhou, Y., Cai, S., Jin, M., Jiang, C., Xu, N., Duan, C., Peng, X., Zhao, J., Ma, X., 2020. Economic burden for retinoblastoma patients in China. *J. Med. Econ.* 6998. <https://doi.org/10.1080/13696998.2020.1831518>

Zhou, Y., Wang, W., Sun, Y., Qian, W., Liu, Z., Wang, R., Qi, L., Yang, J., Song, X., Zhou, X., Zeng, L., Liu, T., Li, Z., Zhang, X., Wang, W., Sun, Y., Qian, W., Liu, Z., Wang, R., Qi, L., Yang, J., Song, X., Zhou, X., Zeng, L., Liu, T., Li, Z., Zhang, X., 2020. *Journal Pre-proof.*

Zhou, Yifang, Yang, Y., Shi, T., Song, Y., Zhou, Yuning, Zhang, Z., Guo, Y., Li, X., Liu, Y., Xu, G., Cheung, T., Xiang, Y.T., Tang, Y., 2020. Prevalence and Demographic

Correlates of Poor Sleep Quality Among Frontline Health Professionals in Liaoning Province, China During the COVID-19 Outbreak. *Front. Psychiatry* 11, 1–6.

<https://doi.org/10.3389/fpsyt.2020.00520>

Zhu, J., Sun, L., Zhang, L., Wang, H., Fan, A., Yang, B., Li, W., Xiao, S., 2020. Prevalence and Influencing Factors of Anxiety and Depression Symptoms in the First-Line Medical Staff Fighting Against COVID-19 in Gansu. *Front. Psychiatry* 11, 1–6.

<https://doi.org/10.3389/fpsyt.2020.00386>

Zhu, Z., Ph, D., Xu, S., Ph, D., Wang, H., Med, M., Liu, Z., Ph, D., 2020a. COVID-19 in Wuhan □ : Immediate Psychological Impact on 5062 Health Workers.

Zhu, Z., Xu, S., Wang, H., Liu, Z., Wu, J., Li, G., Miao, J., Zhang, C., Yang, Y., Sun, W., Zhu, S., Fan, Y., Chen, Y., Hu, J., Liu, J., Wang, W., 2020b. COVID-19 in Wuhan: Sociodemographic characteristics and hospital support measures associated with the immediate psychological impact on healthcare workers. *EClinicalMedicine* 24.

<https://doi.org/10.1016/j.eclinm.2020.100443>

Zhu, Z., Xu, S., Wang, H., Liu, Z., Wu, J., Li, G., Miao, J., Zhang, C., Yang, Y., Sun, W., Zhu, S., Fan, Y., Hu, J., Liu, J., Wang, W., 2020c. COVID-19 in Wuhan: Immediate Psychological Impact on 5062 Health Workers. *EClinicalMedicine*.

<https://doi.org/10.1101/2020.02.20.20025338>
